# Supplementary material for: Design, synthesis and biological evaluation of quinazoline and pyrrolo[3,2-d]pyrimidine derivatives as TLR7 agonists for antiviral agents
Source: Royal Society of Chemistry journal article supplement (doi:10.1039/d4ob00048j), 2024-01-01
Supplement: d4ob00048j1.pdf [file d4ob00048j1.pdf]

Support Information for

## Design, synthesis and biological evaluation of quinazoline and pyrrolo[3,2-*d*]pyrimidine derivatives as TLR7 agonists for antiviral agents

Yue Song<sup>a,d,e,f,†</sup>, Wenjie Fan<sup>a,e,f,†</sup>, Chen Yao<sup>a,e,f,†</sup>, Heng Wang<sup>a,e,f</sup>, Xiuxiang Lu<sup>a,e,f</sup>, Yumin Wang<sup>a,e,f</sup>, Pengxiang Liu<sup>a,e,f</sup>, Yanjie Ma<sup>a,e,f</sup>, Zhen Zhang<sup>d</sup>, Jiang Wang<sup>a,e,f</sup>, BeiBei Chu<sup>a,e,f</sup>, Lijun Shi<sup>b,\*</sup>, Guoyu Yang<sup>c,e,f,\*</sup>, Mengdi Wang<sup>c,\*</sup>

---

<sup>a</sup> College of Veterinary Medicine, Henan Agricultural University, Zhengzhou, Henan, 450046, China.

<sup>b</sup> College of Sciences, Henan Agricultural University, Zhengzhou, Henan, 450046, China.

<sup>c</sup> College of Food and Bioengineering, Henan University of Animal Husbandry and Economy, Zhengzhou Henan, 450046, China.

<sup>d</sup> Molecule Biology Laboratory of Zhengzhou Normal University, Zhengzhou Henan, 450044, China.

<sup>e</sup> Key Laboratories of Animal Biochemistry and Nutrition, Ministry of Agriculture and Rural Affairs, Zhengzhou, Henan Province, 450046, China.

<sup>f</sup> Key Laboratory of Animal Growth and Development of Henan Province, Zhengzhou, Henan Province, 450046, China.

† Co-first authors.

\*Corresponding authors.

## Content

|                                                  |     |
|--------------------------------------------------|-----|
| Fig. S1. $^1\text{H}$ NMR of <b>3</b> .....      | S3  |
| Fig. S2. $^{13}\text{C}$ NMR of <b>3</b> .....   | S3  |
| Fig. S3. $^1\text{H}$ NMR of <b>5</b> .....      | S4  |
| Fig. S4. $^{13}\text{C}$ NMR of <b>5</b> .....   | S4  |
| Fig. S5. $^1\text{H}$ NMR of <b>6</b> .....      | S5  |
| Fig. S6. $^{13}\text{C}$ NMR of <b>6</b> .....   | S5  |
| Fig. S7. $^1\text{H}$ NMR of <b>10</b> .....     | S6  |
| Fig. S8. $^{13}\text{C}$ NMR of <b>10</b> .....  | S6  |
| Fig. S9. $^1\text{H}$ NMR of <b>11</b> .....     | S7  |
| Fig. S10. $^{13}\text{C}$ NMR of <b>11</b> ..... | S7  |
| Fig. S11. $^1\text{H}$ NMR of <b>12</b> .....    | S8  |
| Fig. S12. $^{13}\text{C}$ NMR of <b>12</b> ..... | S8  |
| Fig. S13. $^1\text{H}$ NMR of <b>13</b> .....    | S9  |
| Fig. S14. $^{13}\text{C}$ NMR of <b>13</b> ..... | S9  |
| Fig. S15. $^1\text{H}$ NMR of <b>14</b> .....    | S10 |
| Fig. S16. $^{13}\text{C}$ NMR of <b>14</b> ..... | S10 |
| Fig. S17. HRMS of <b>3</b> .....                 | S11 |
| Fig. S18. HRMS of <b>5</b> .....                 | S11 |
| Fig. S19. HRMS of <b>6</b> .....                 | S12 |
| Fig. S20. HRMS of <b>10</b> .....                | S12 |
| Fig. S21. HRMS of <b>11</b> .....                | S13 |
| Fig. S22. HRMS of <b>12</b> .....                | S13 |
| Fig. S23. HRMS of <b>13</b> .....                | S14 |
| Fig. S24. HRMS of <b>14</b> .....                | S14 |

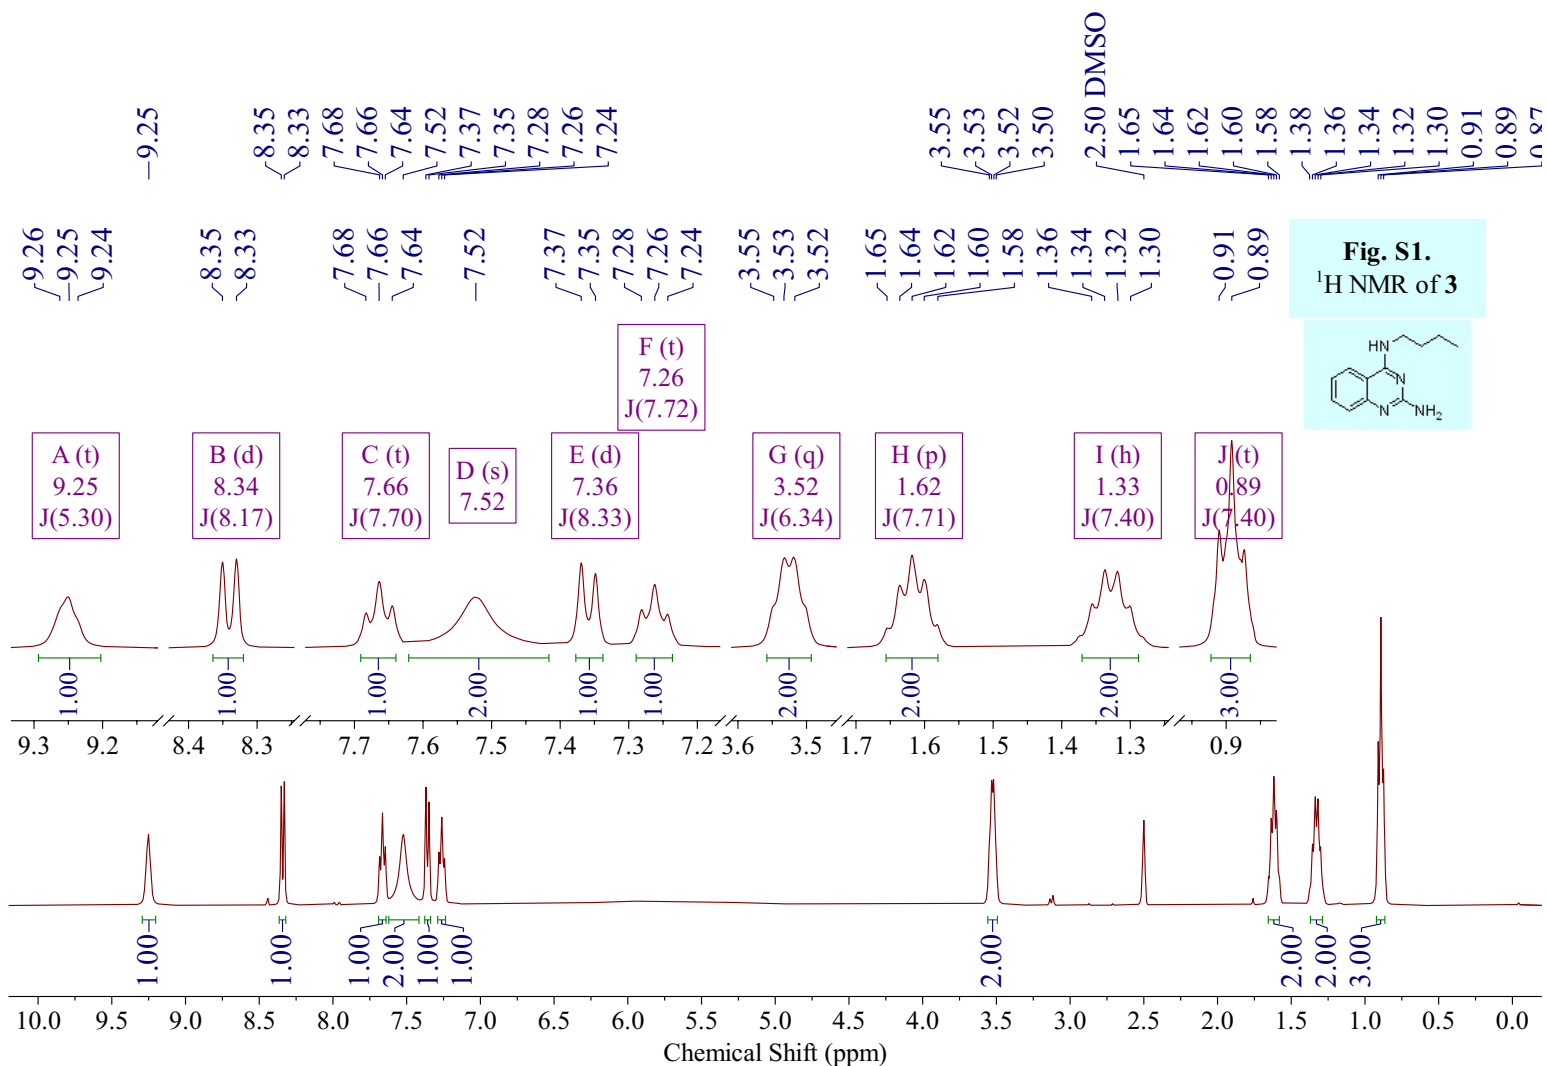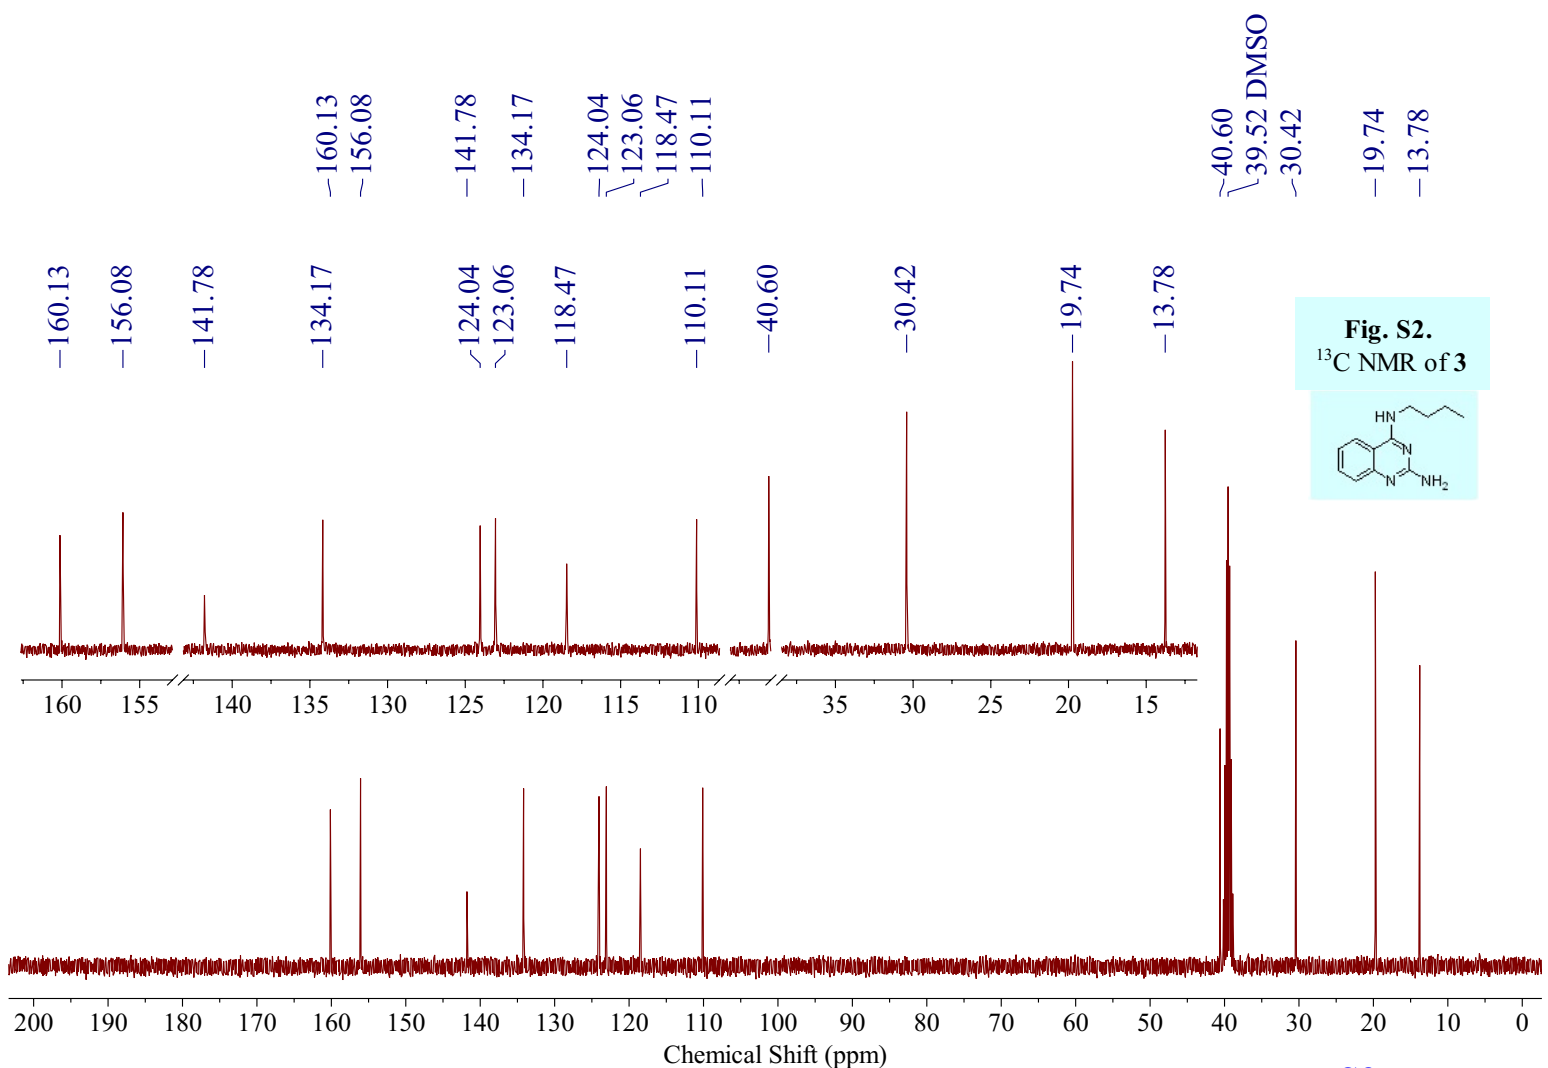

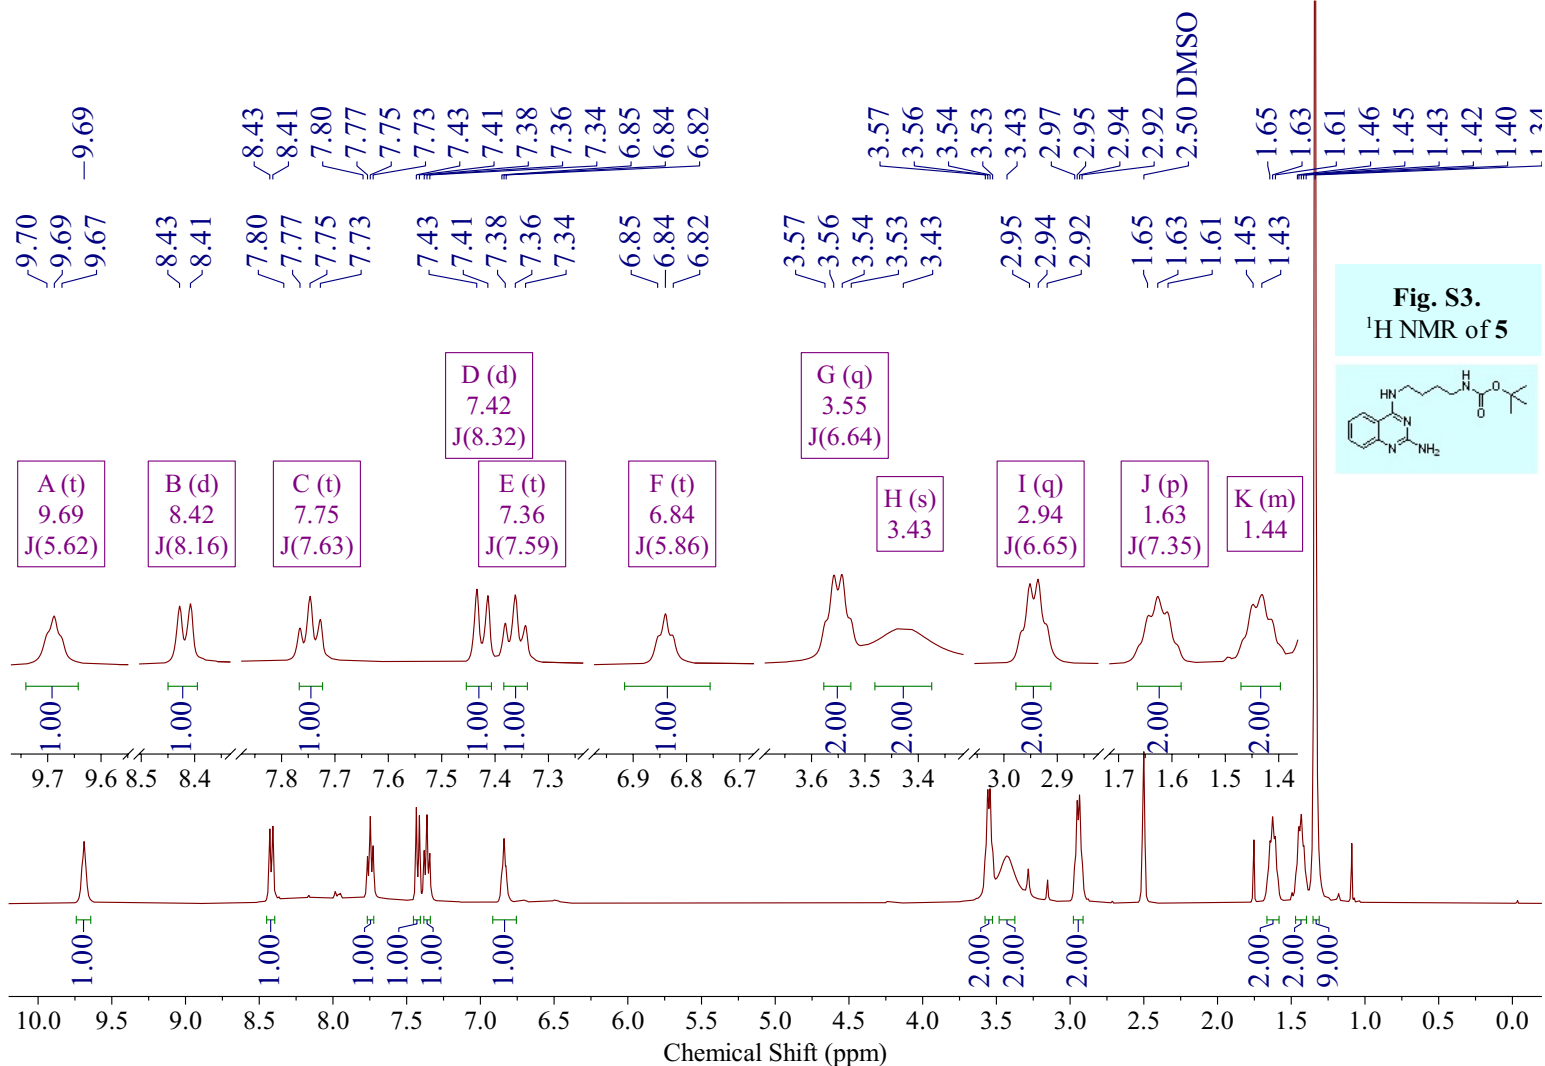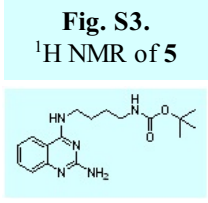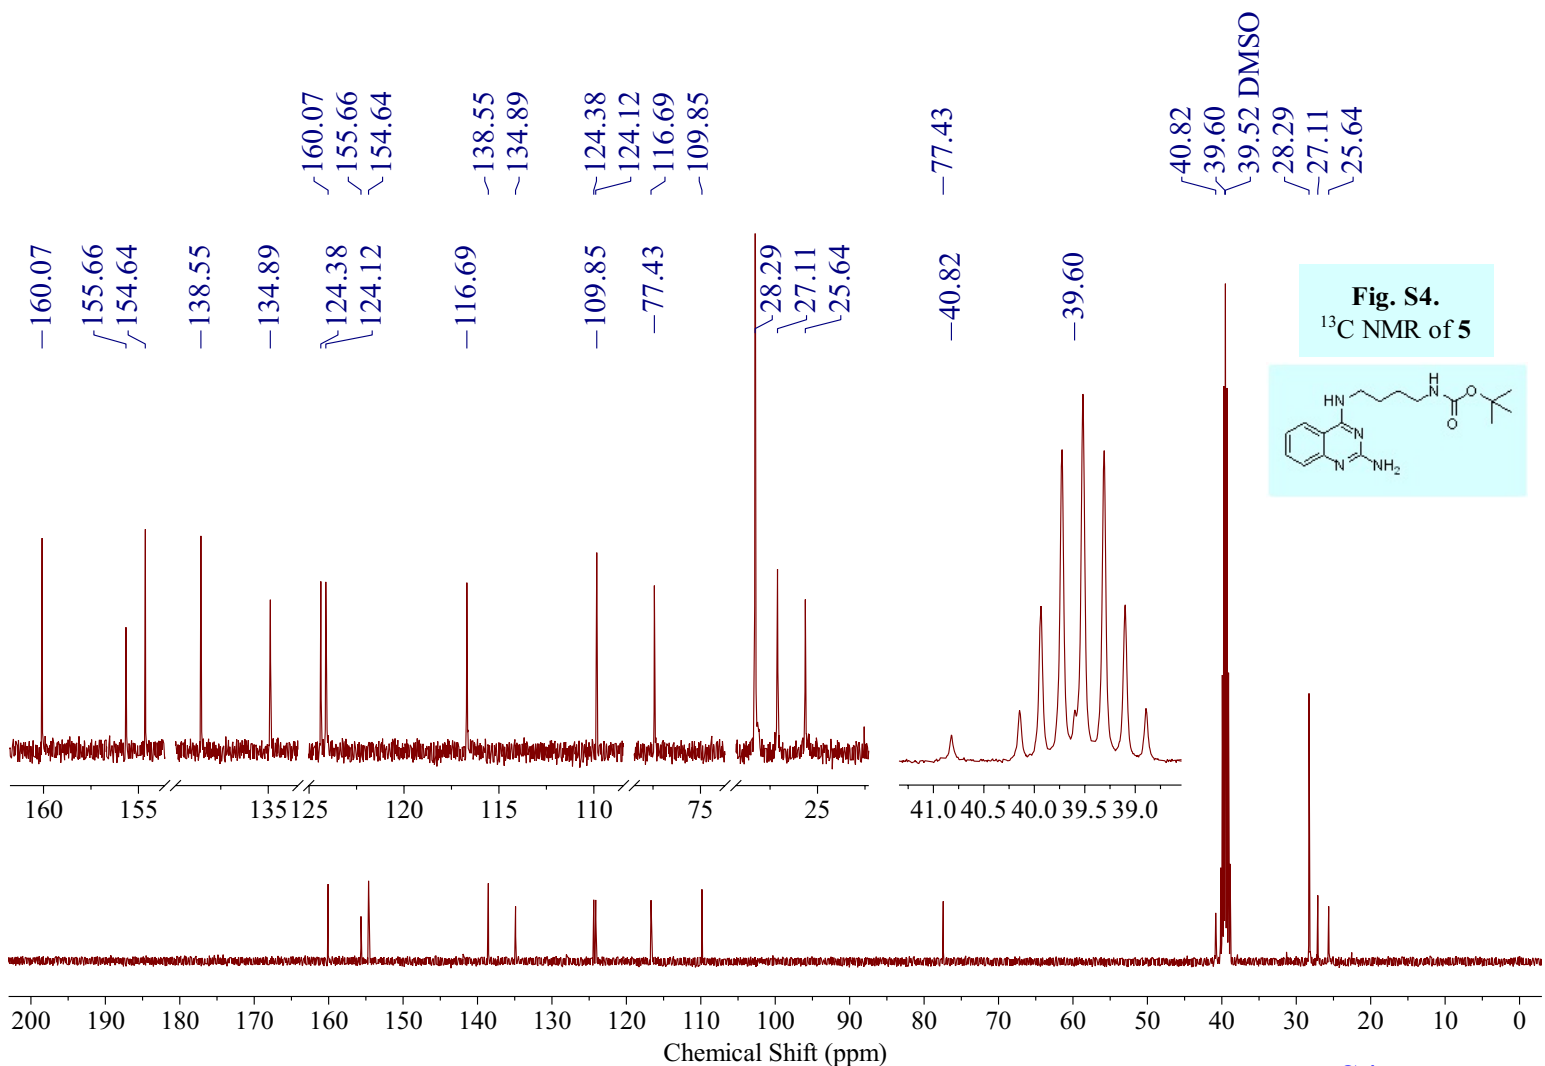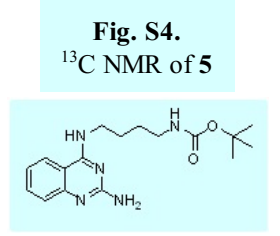

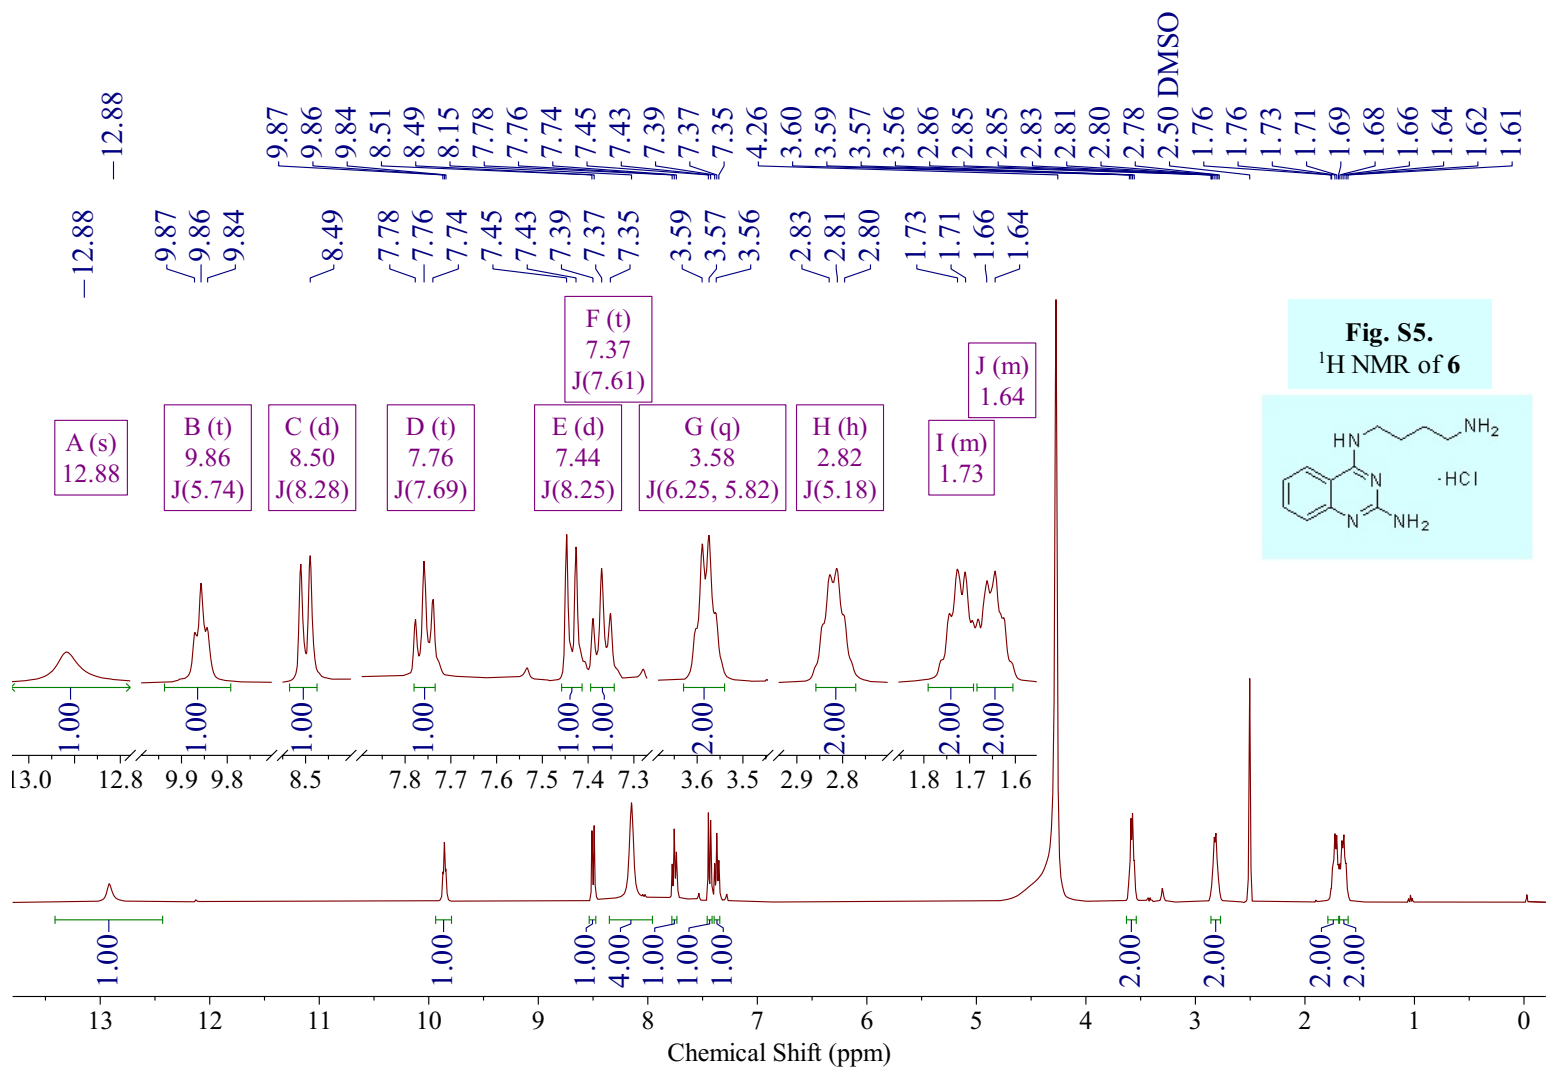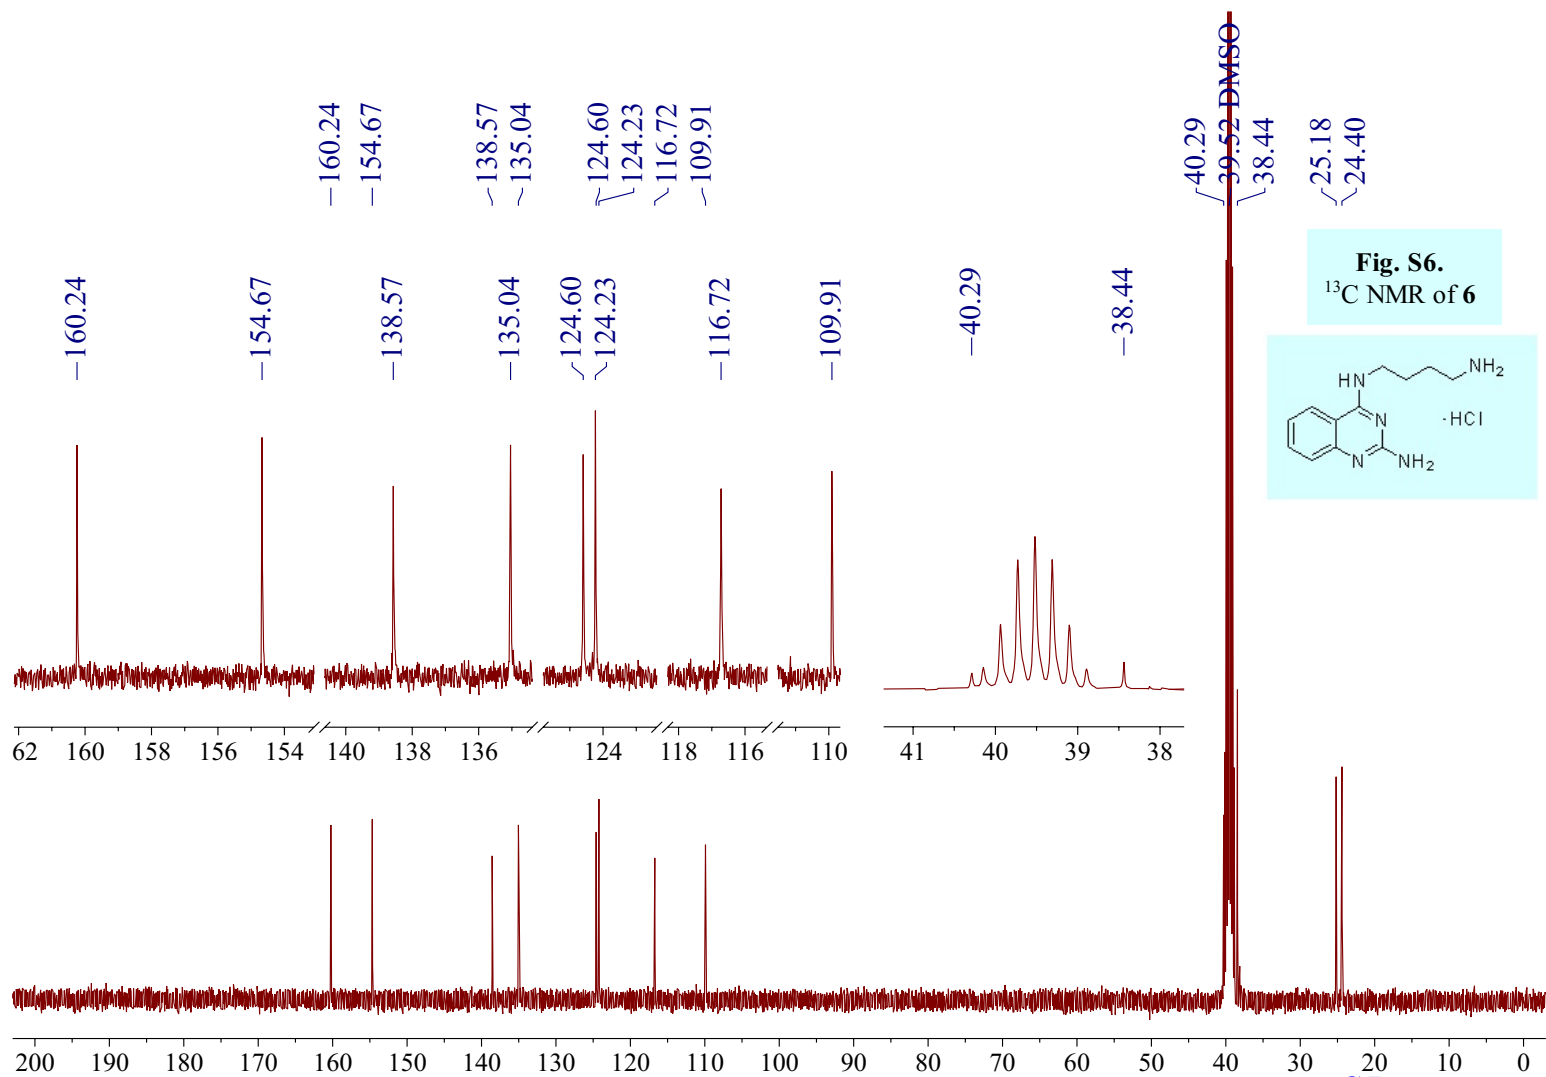

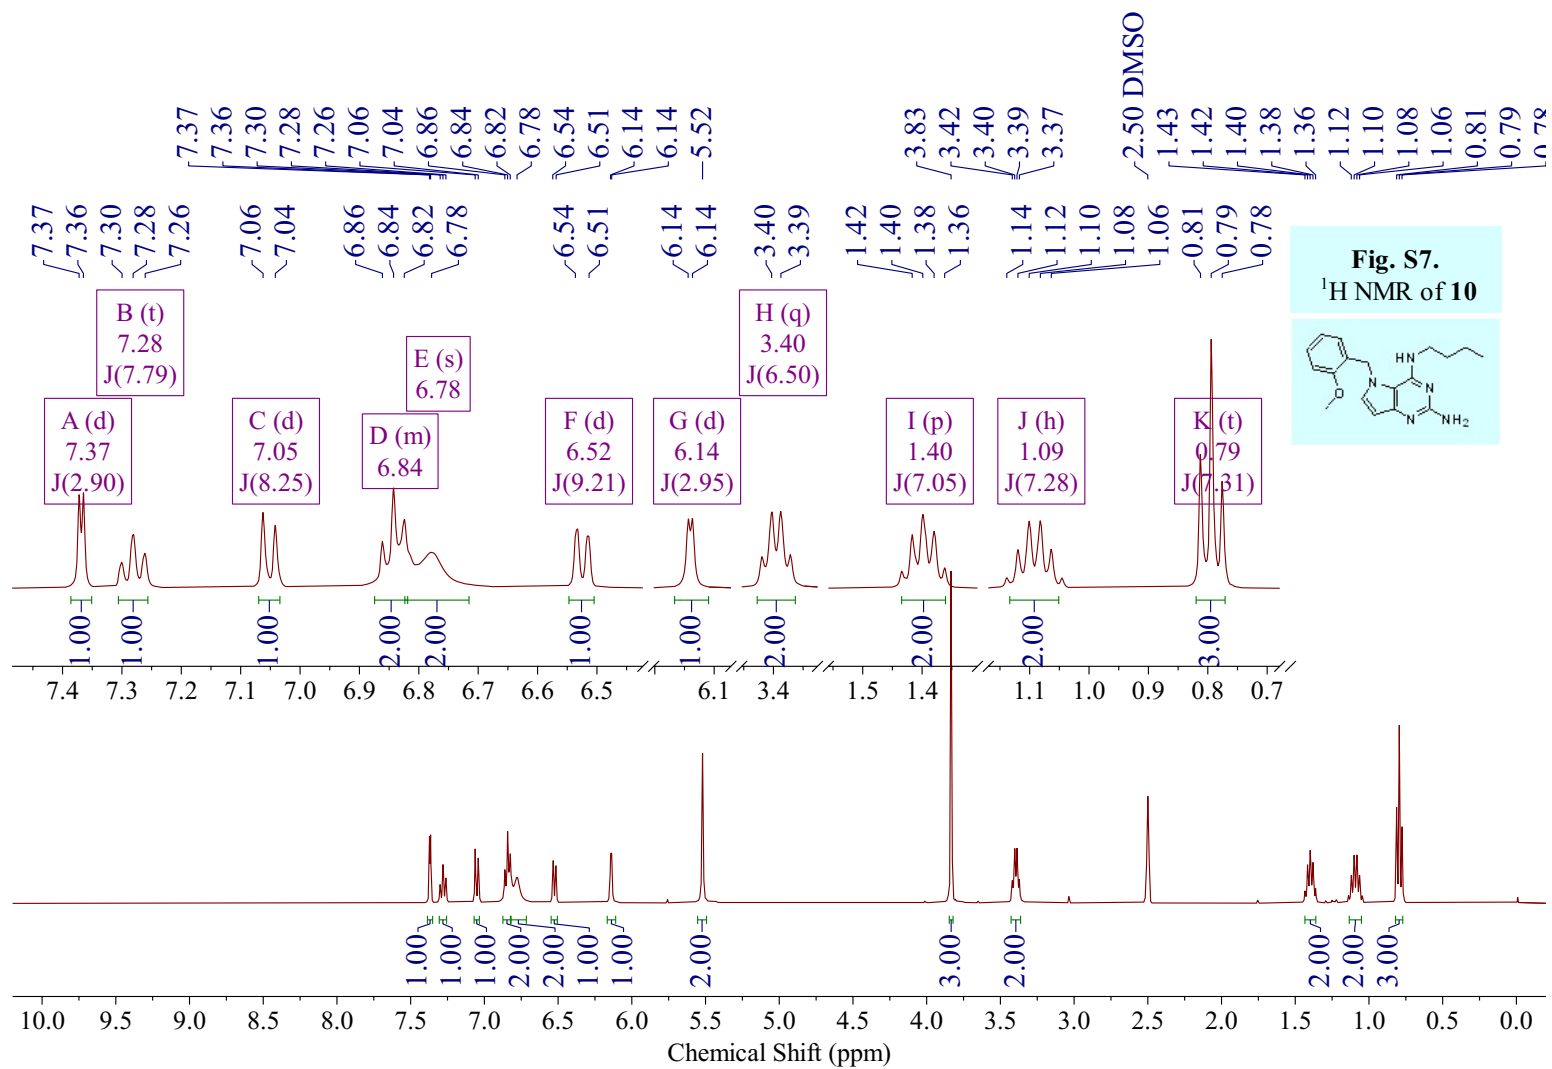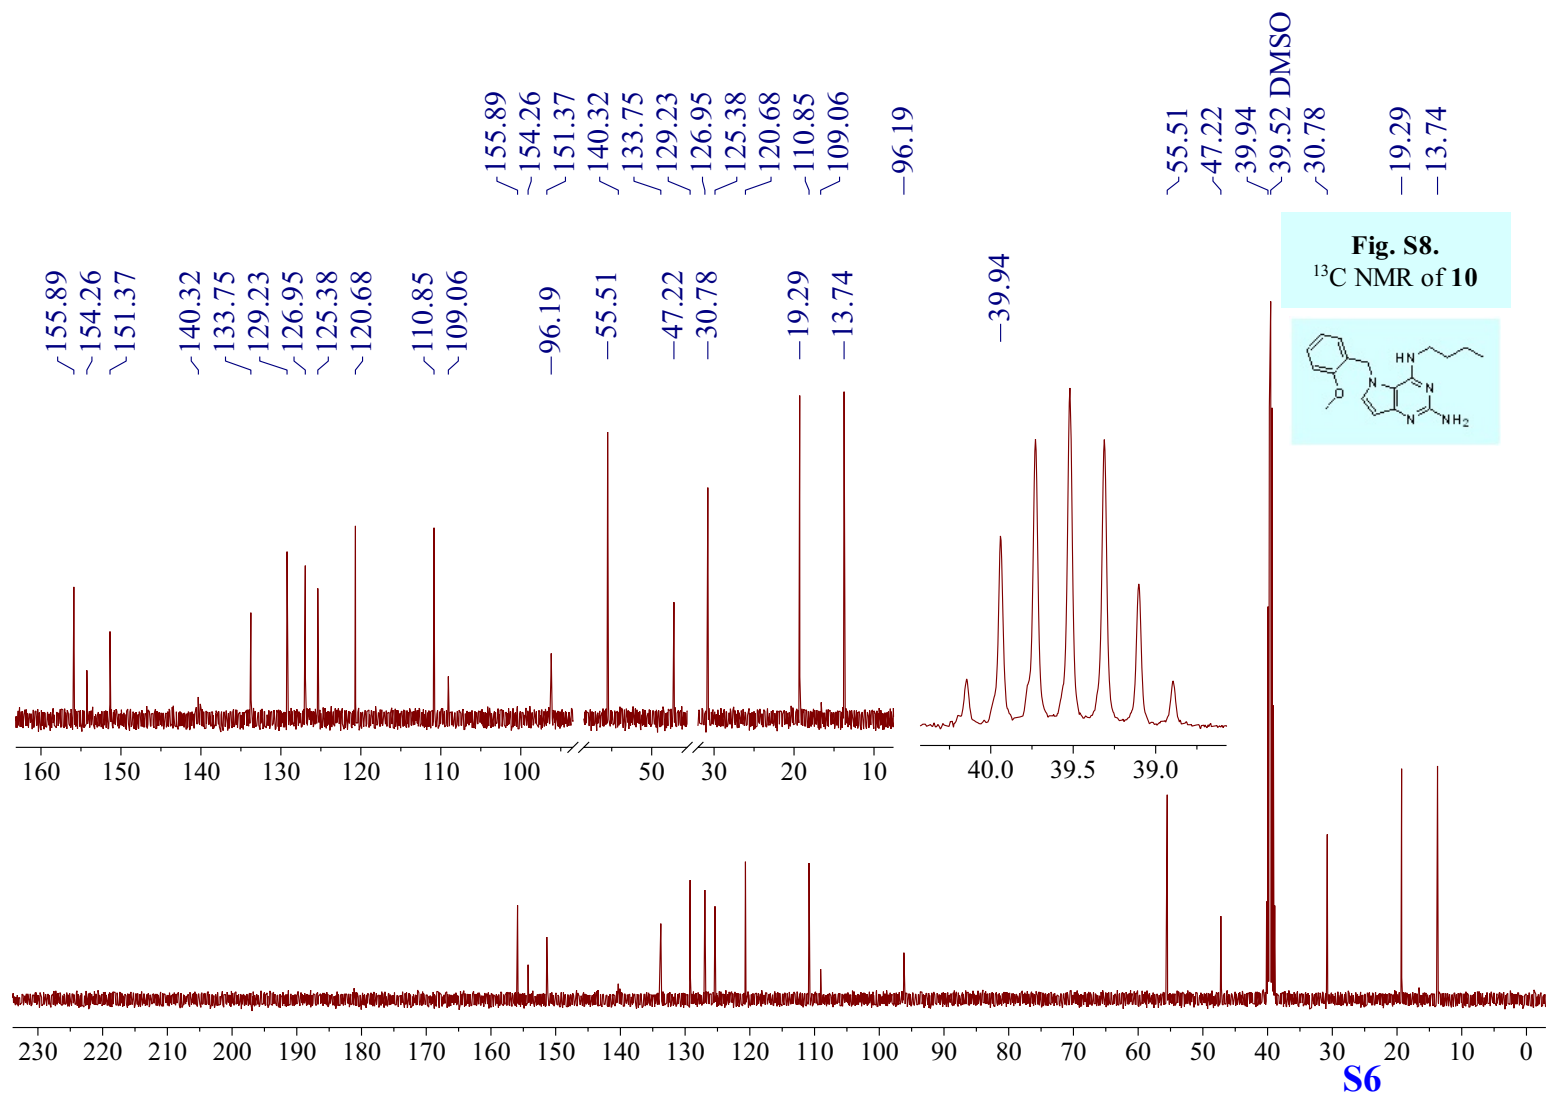

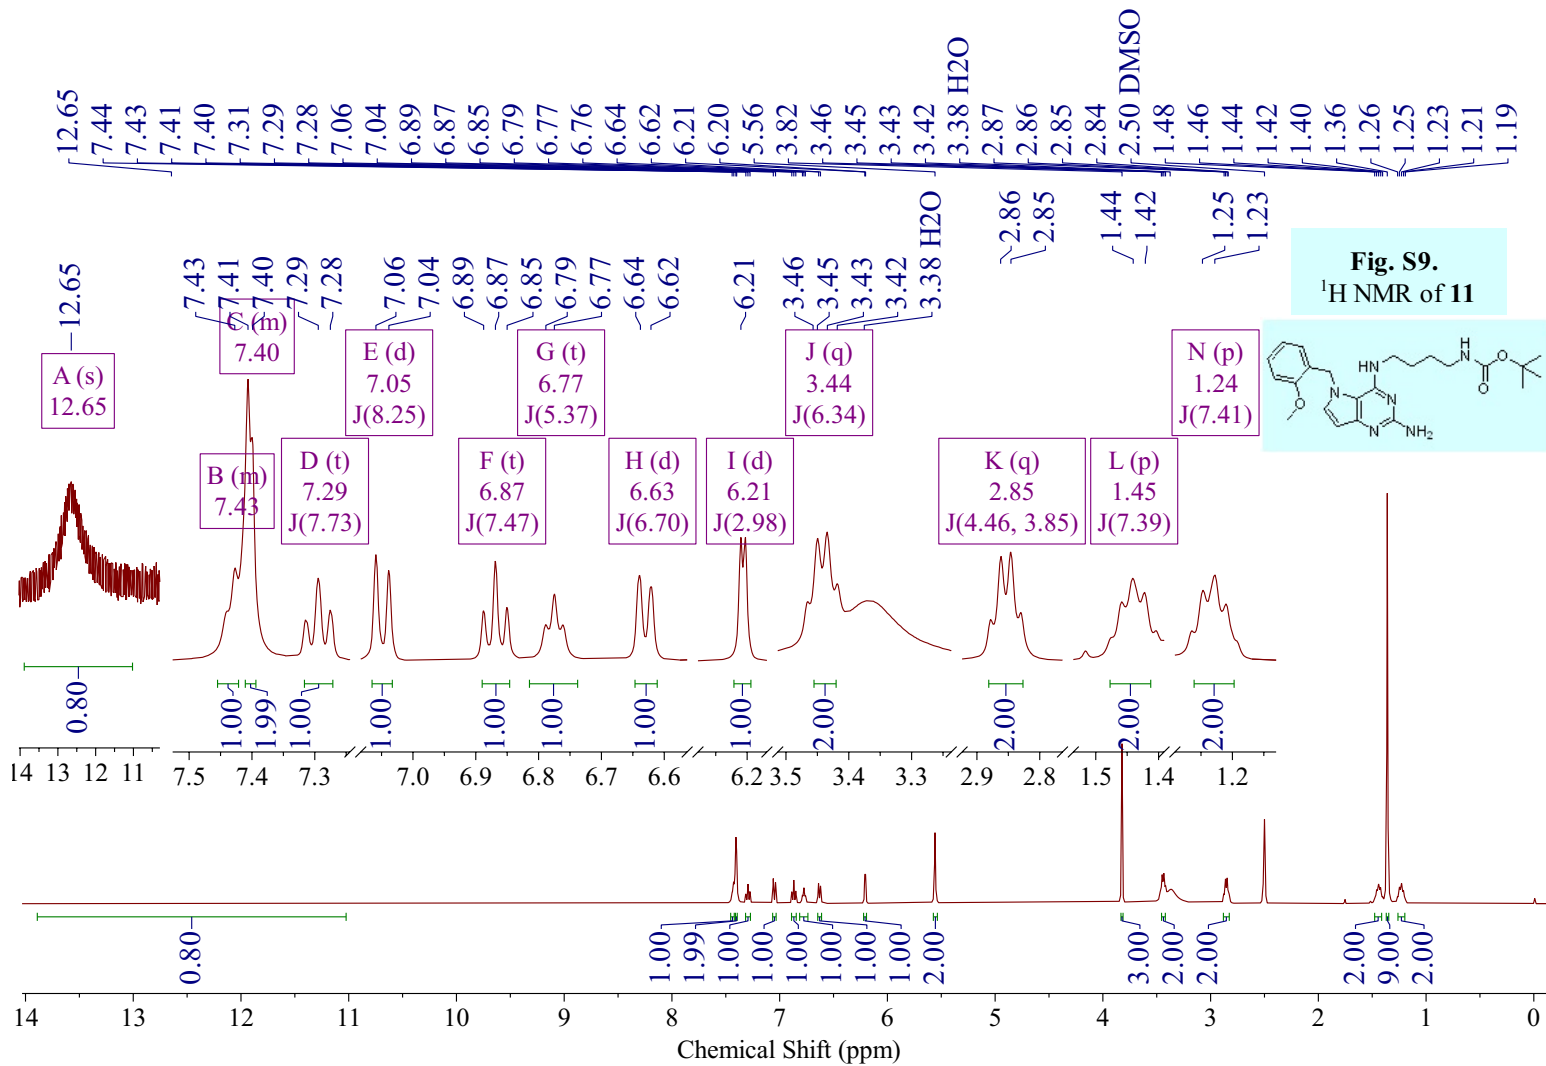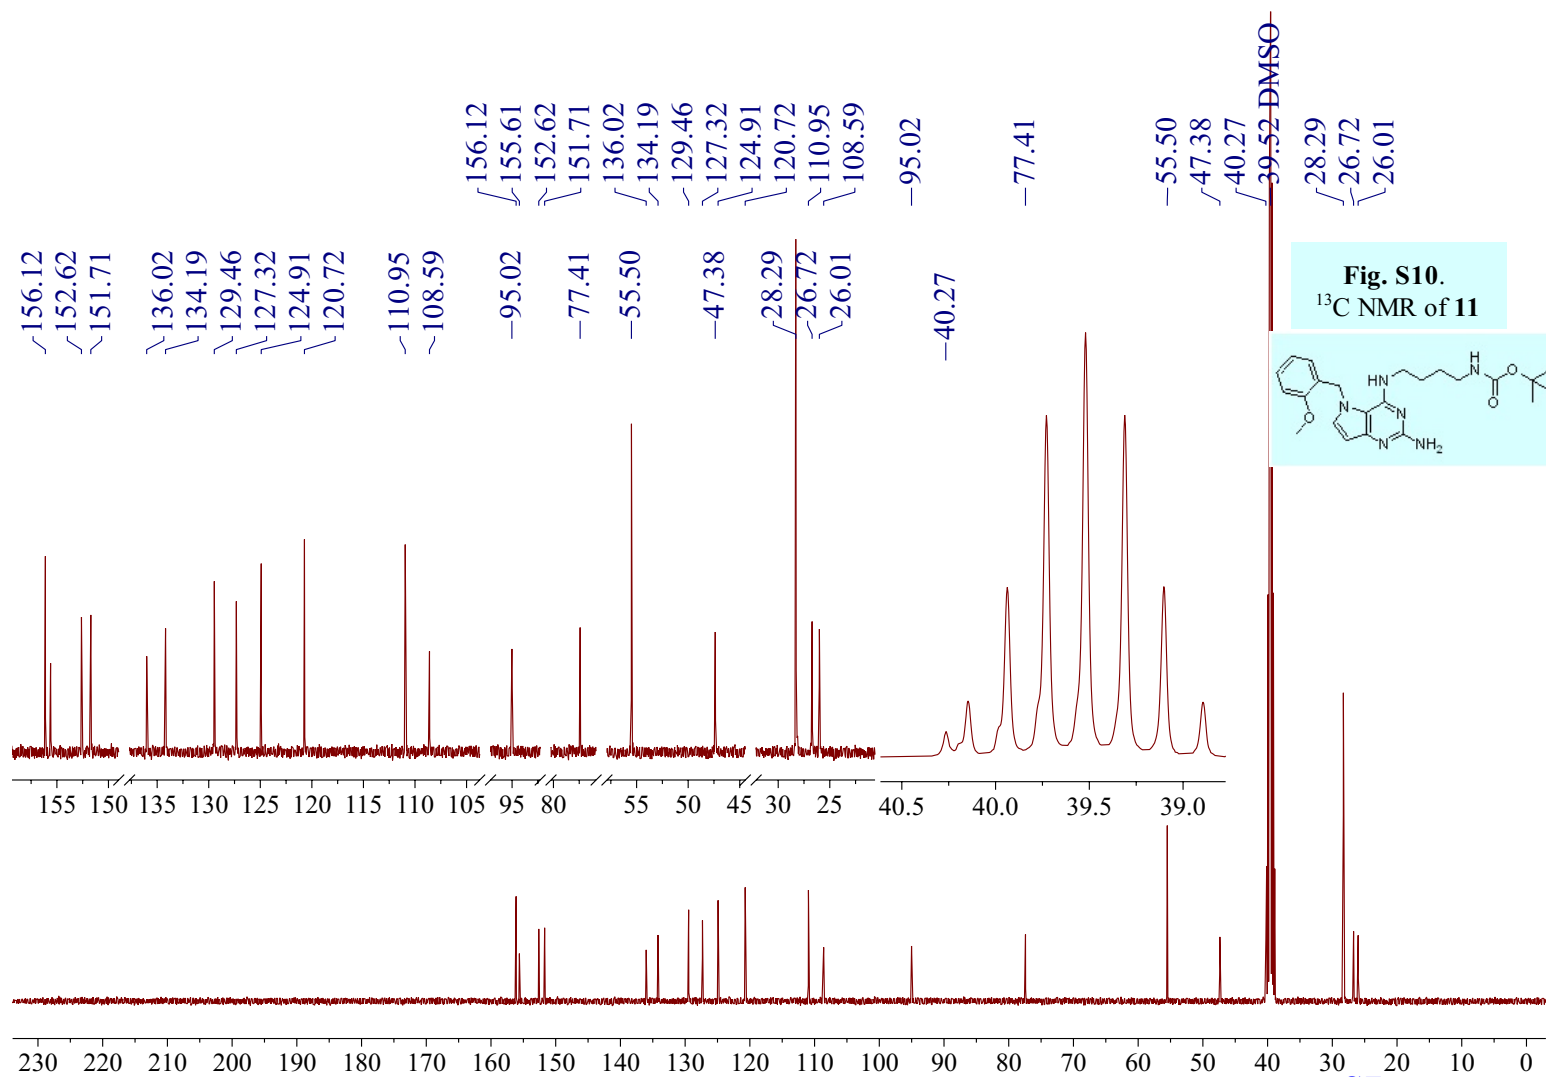

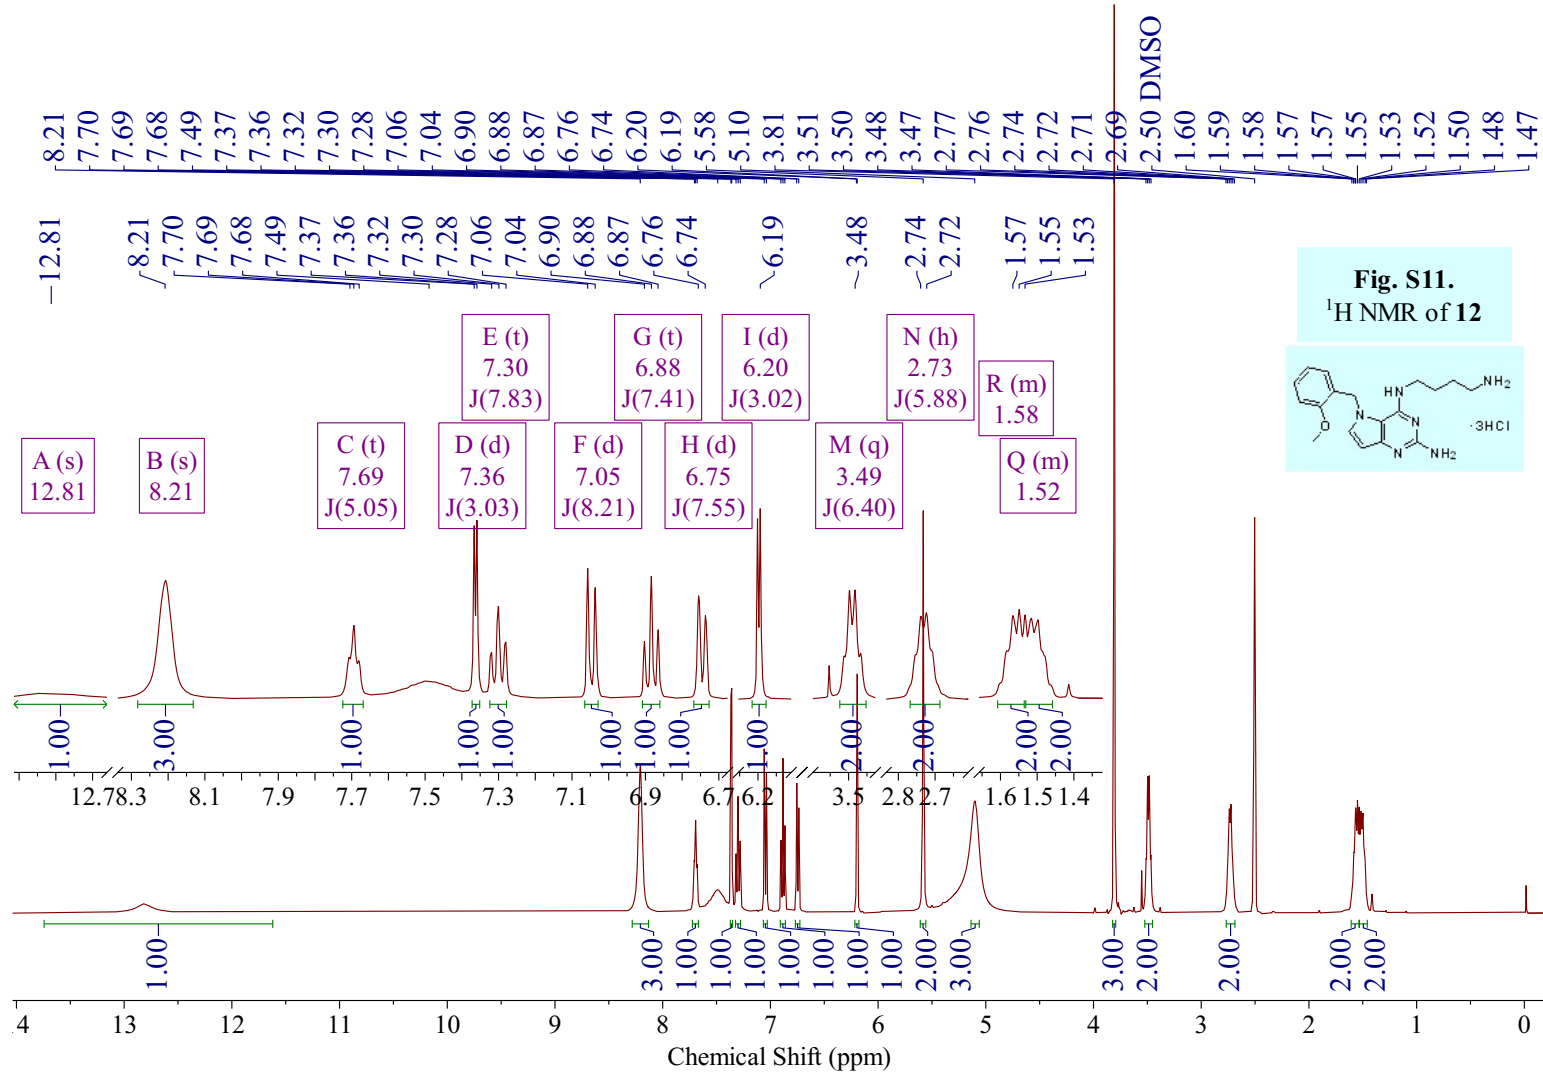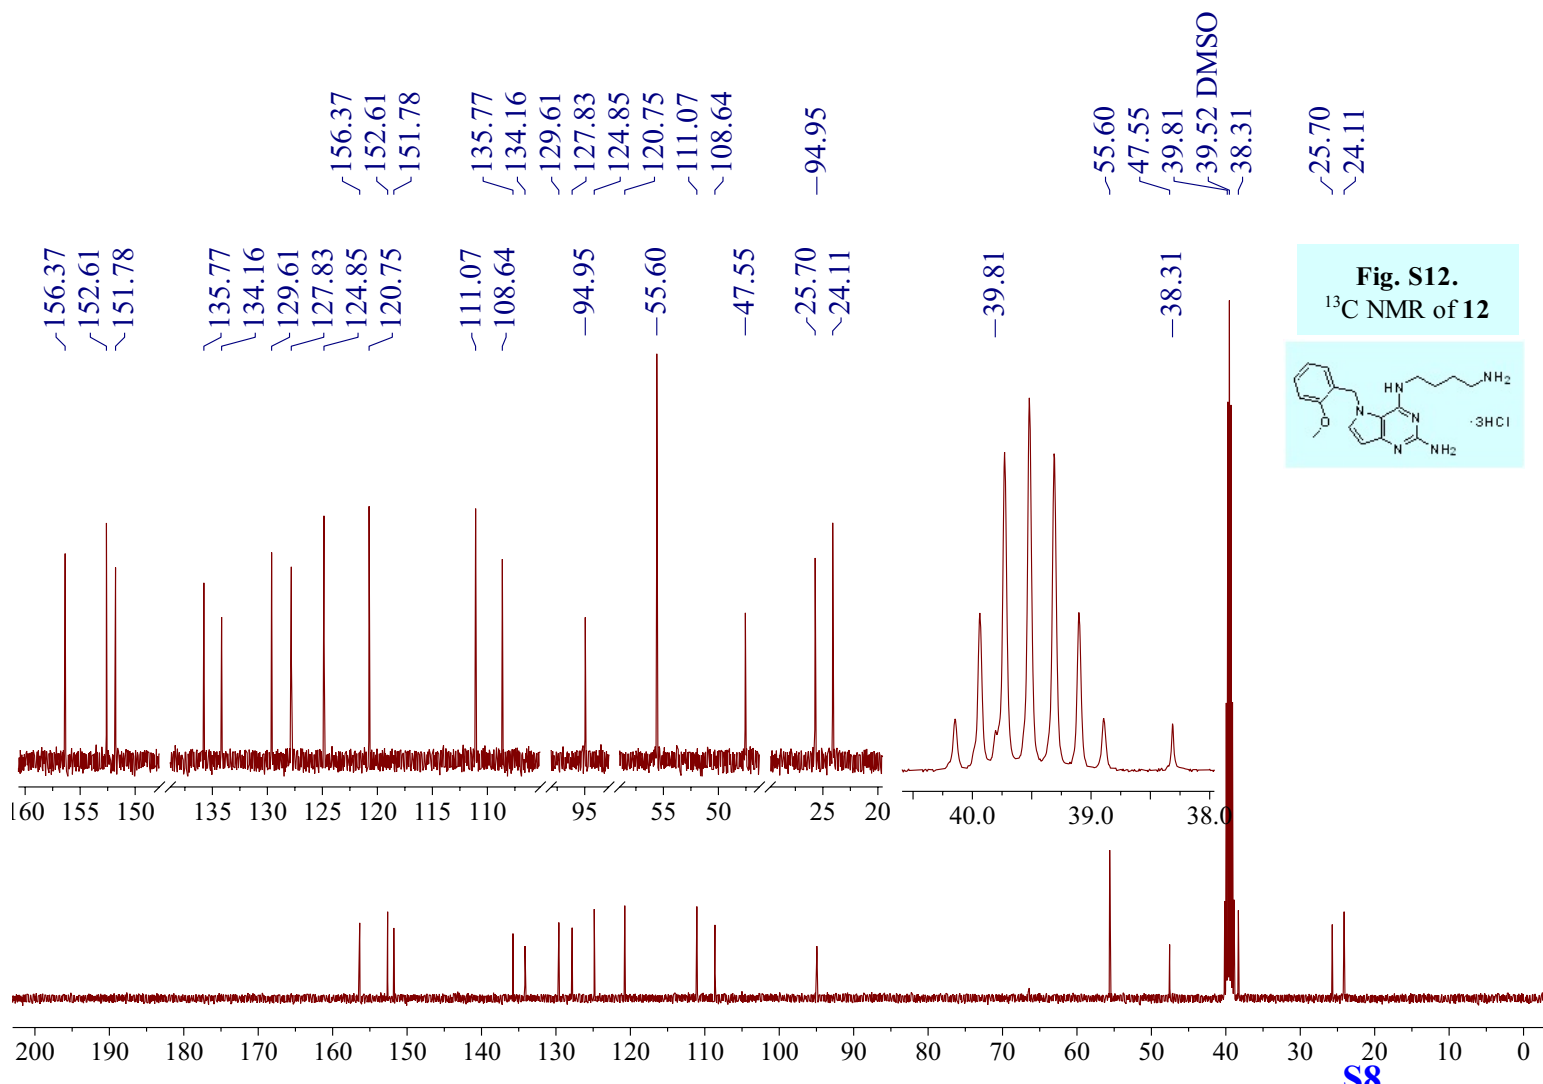



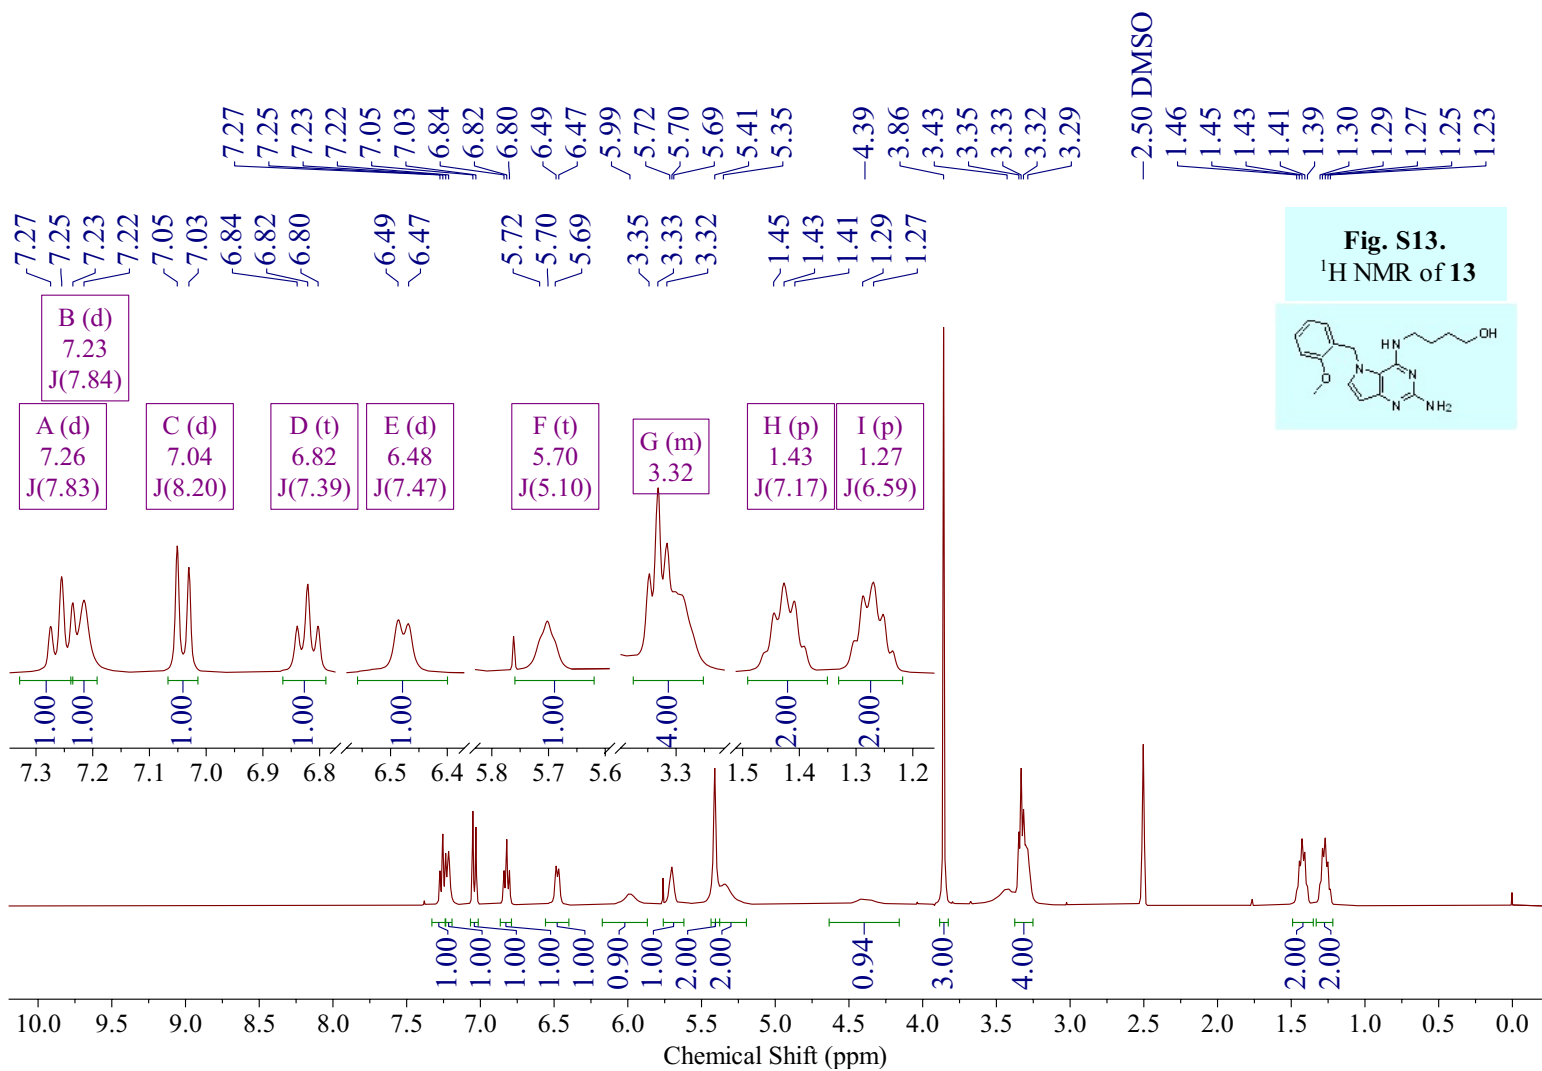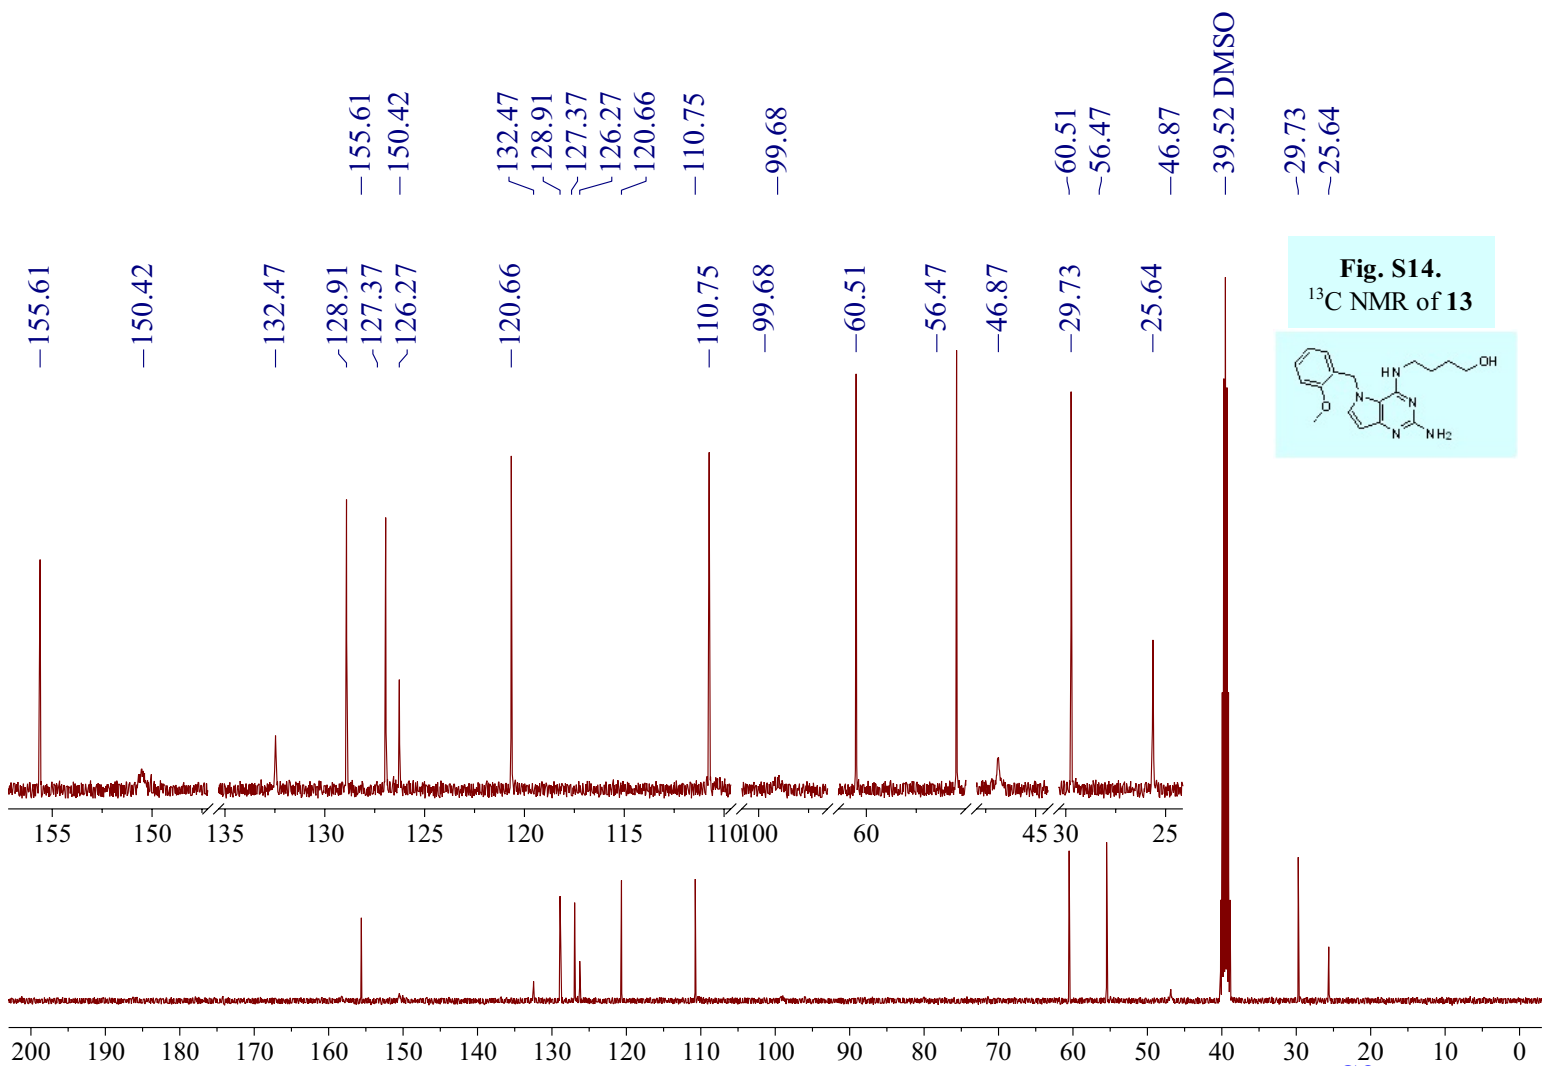

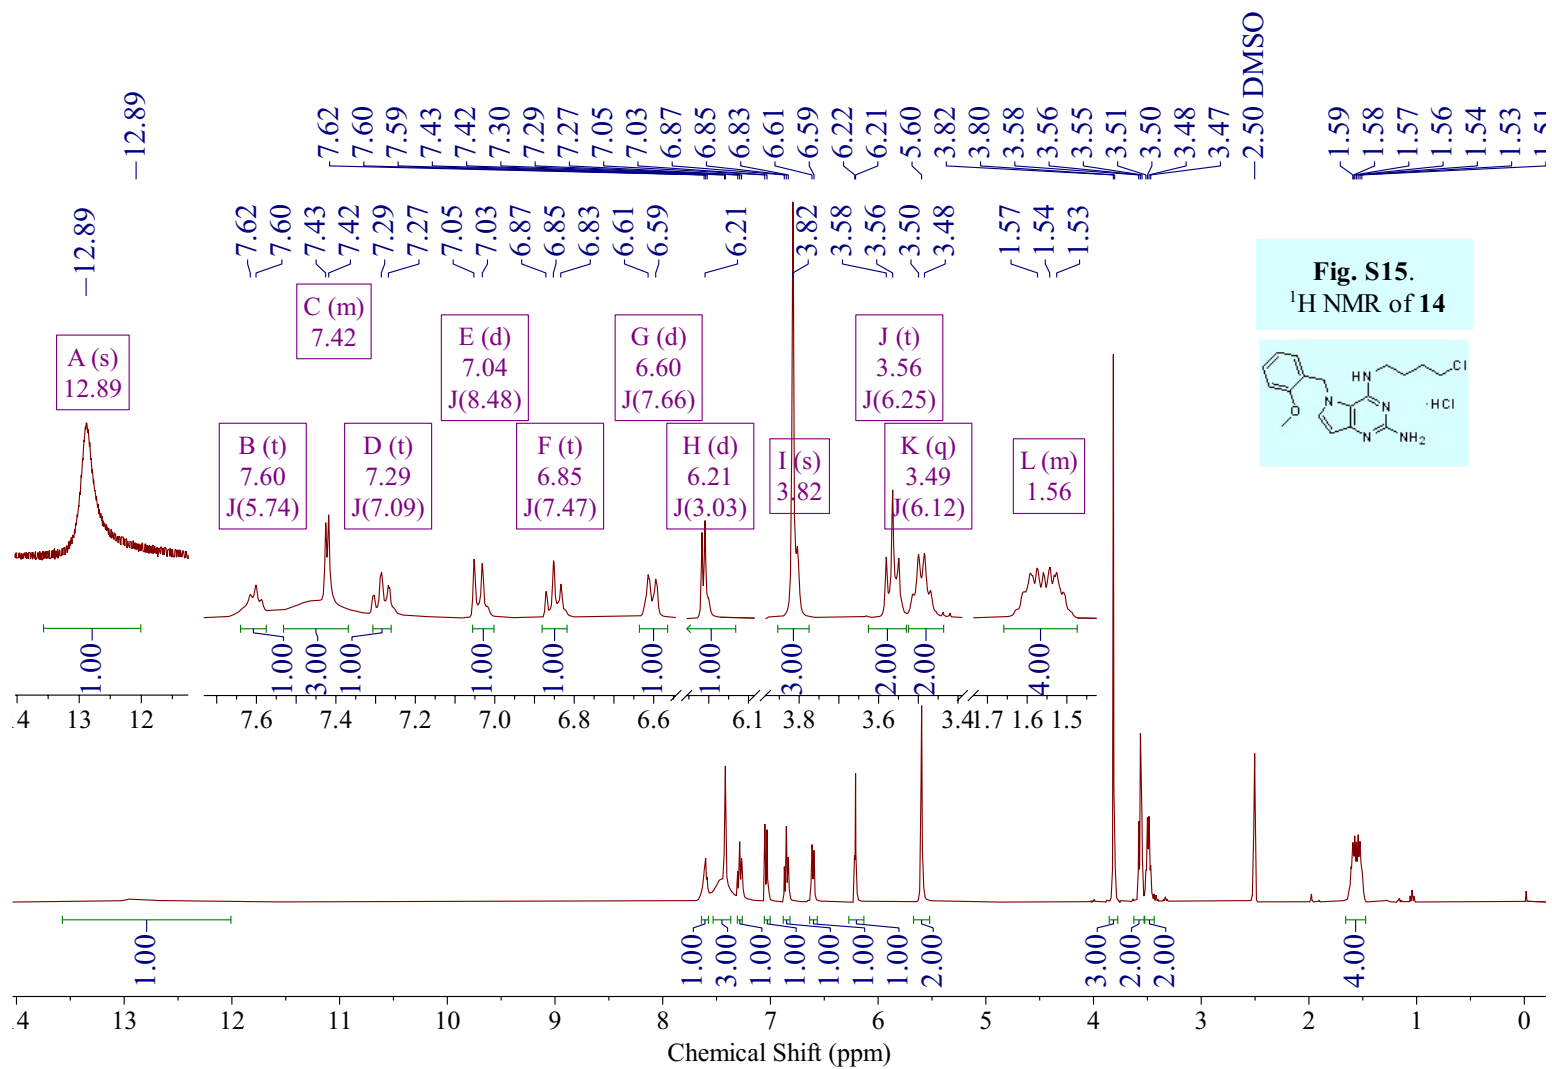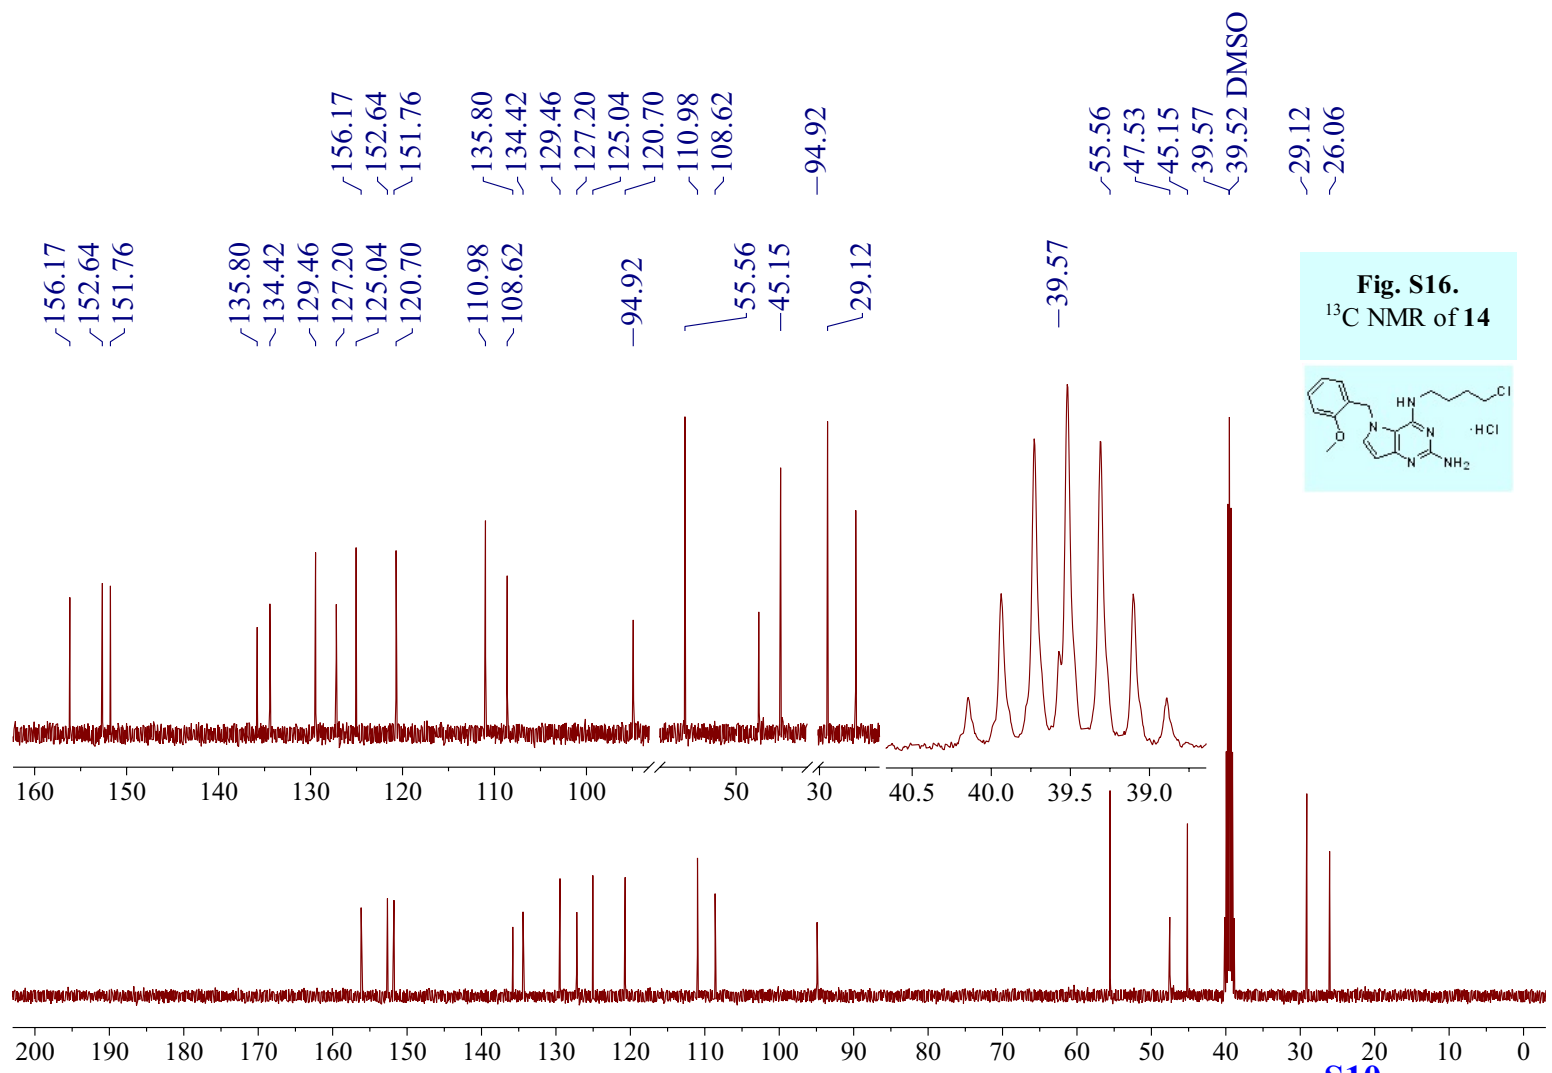

701 #11-70 RT: 0.10-0.65 AV: 30 NL: 3.73E9  
T: FTMS + p ESI Full ms [200.00-500.00]

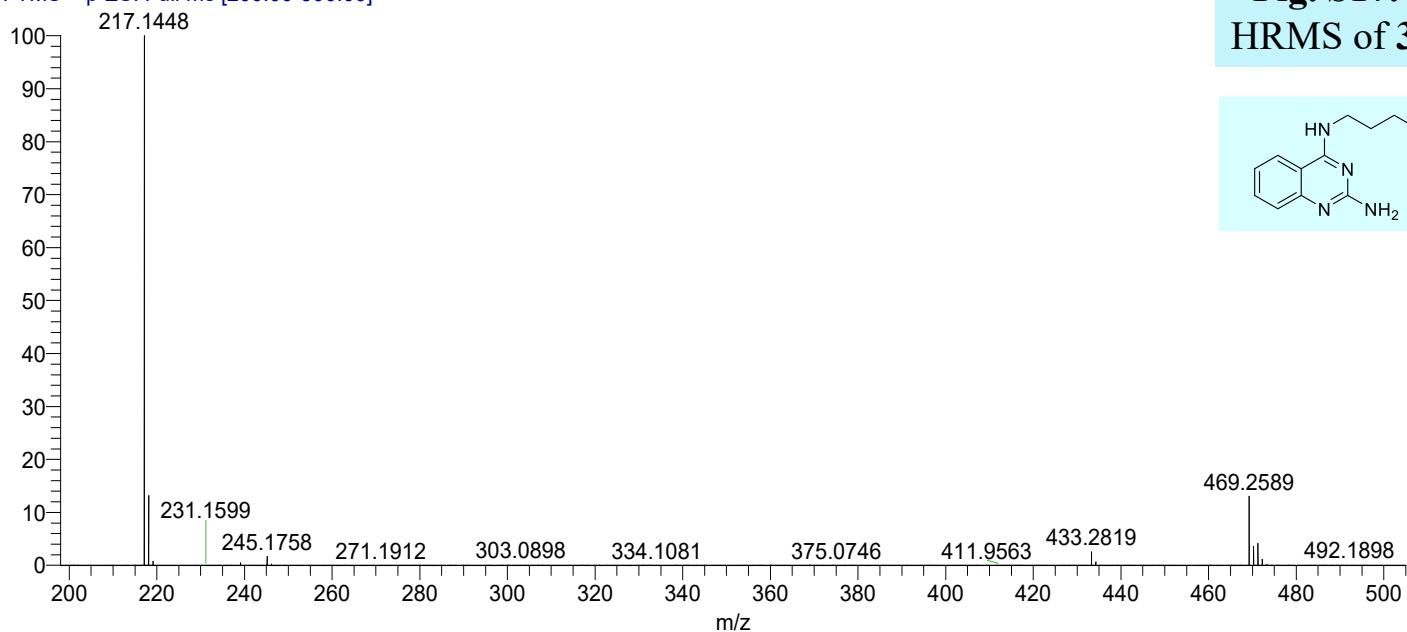

**Fig. S17.**  
HRMS of **3**

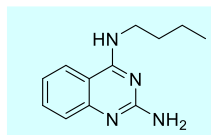

HRMS (ESI) m/z [M+H]<sup>+</sup> calculated for  
C<sub>12</sub>H<sub>17</sub>N<sub>4</sub>: 217.1453 found: 217.1448.

702 #20-74 RT: 0.19-0.68 AV: 27 NL: 4.24E9  
T: FTMS + p ESI Full ms [200.00-500.00]

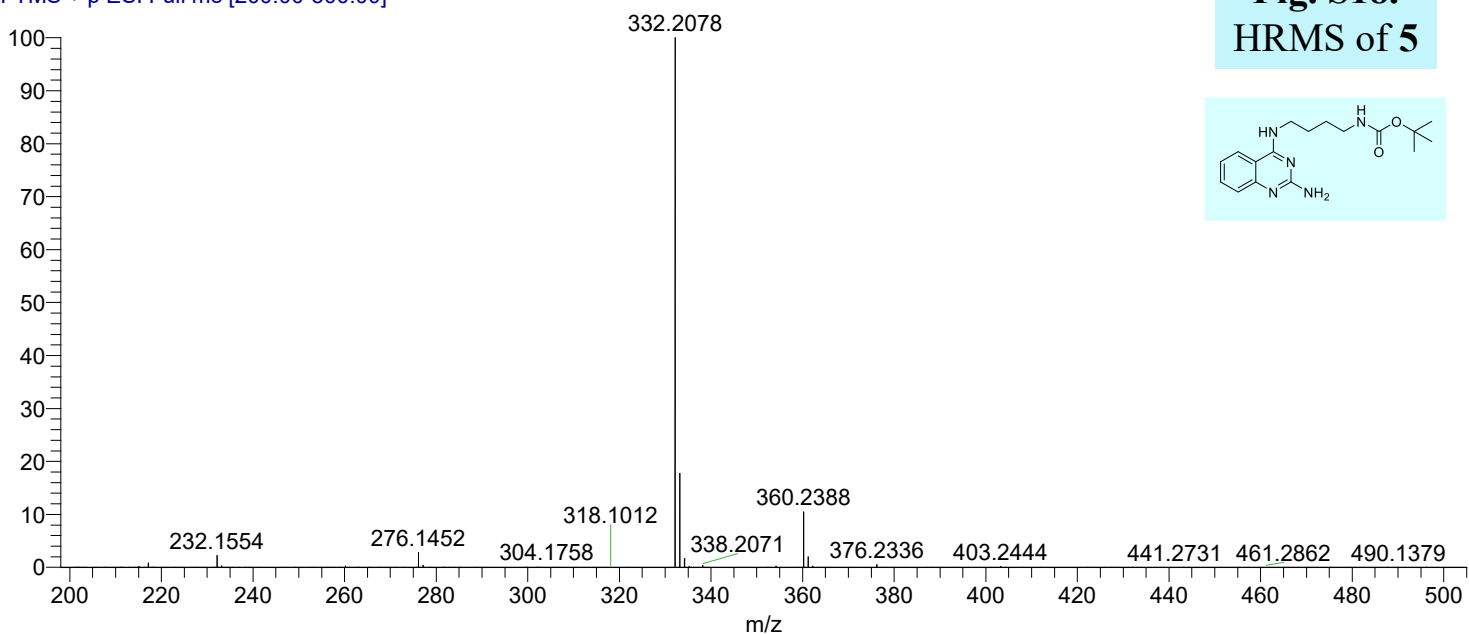

**Fig. S18.**  
HRMS of **5**

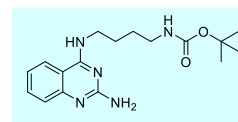

HRMS (ESI) m/z [M+H]<sup>+</sup> calculated for  
C<sub>17</sub>H<sub>25</sub>N<sub>5</sub>O<sub>2</sub>: 332.2087 found: 332.2078.

703 #11-49 RT: 0.10-0.46 AV: 20 NL: 2.32E9  
T: FTMS + p ESI Full ms [200.00-500.00]

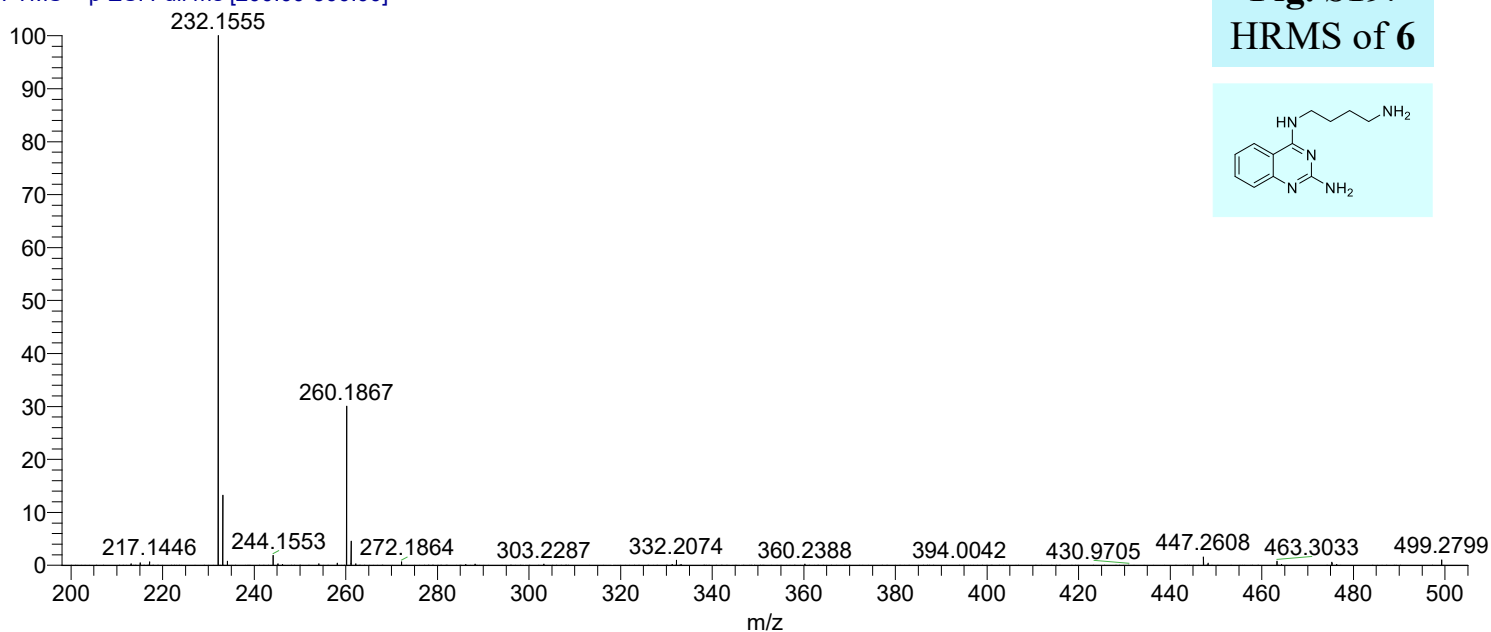

**Fig. S19.**  
HRMS of **6**

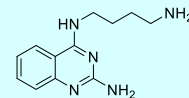

HRMS (ESI) m/z [M+H]<sup>+</sup> calculated for  
C<sub>12</sub>H<sub>18</sub>N<sub>5</sub>: 232.1562 found: 232.1555.

710 #20-60 RT: 0.19-0.55 AV: 20 NL: 4.41E9  
T: FTMS + p ESI Full ms [200.00-500.00]

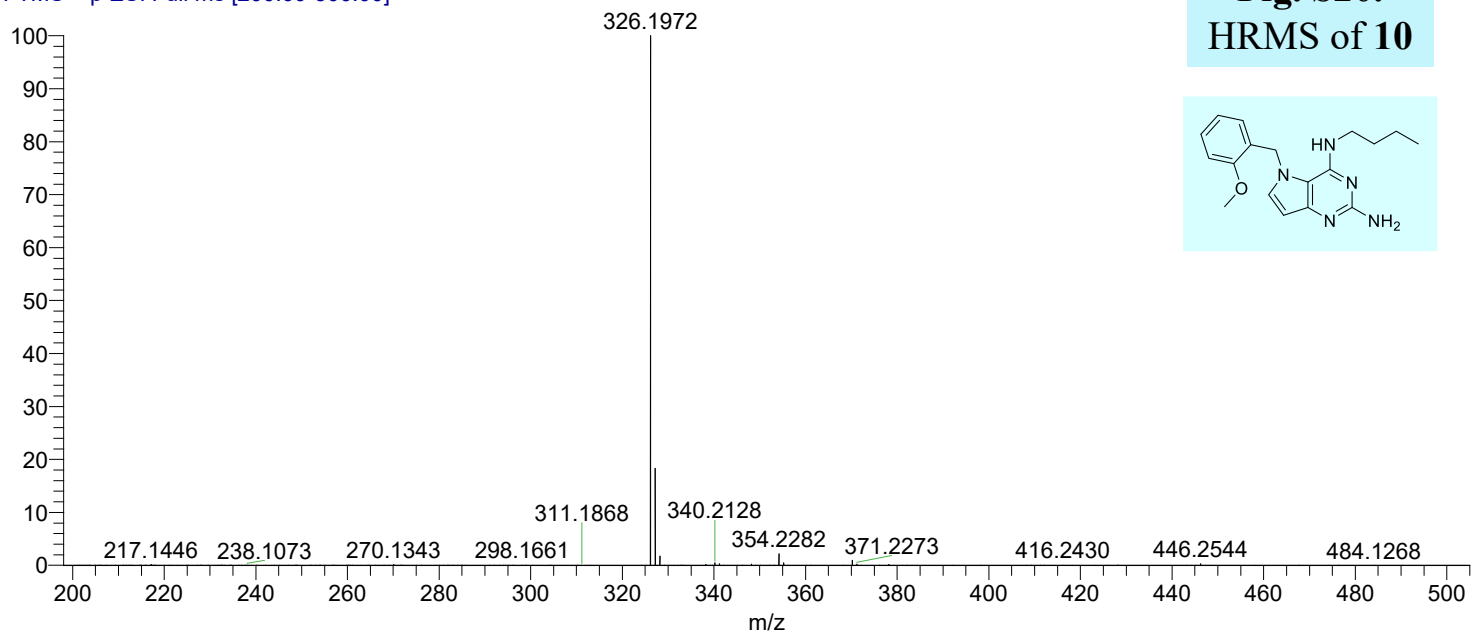

**Fig. S20.**  
HRMS of **10**

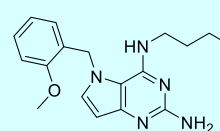

HRMS (ESI) m/z [M+H]<sup>+</sup> calculated for  
C<sub>18</sub>H<sub>24</sub>N<sub>5</sub>O: 326.1975 found: 326.1972.

713 #20-50 RT: 0.19-0.46 AV: 15 NL: 4.71E9  
T: FTMS + p ESI Full ms [200.00-500.00]

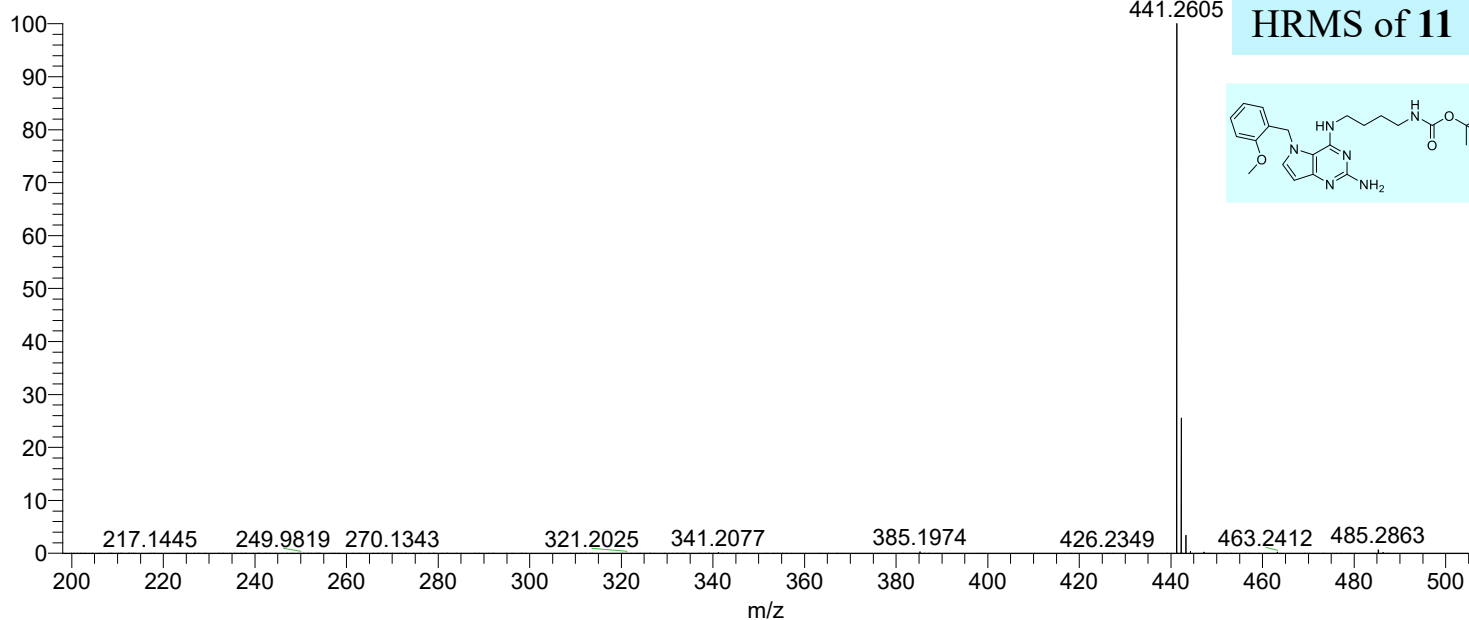

HRMS (ESI)  $m/z$   $[M+H]^+$  calculated for  
 $C_{23}H_{33}N_6O_3$ : 441.2614 found: 441.2605.

711 #22-58 RT: 0.21-0.53 AV: 18 NL: 3.11E9  
T: FTMS + p ESI Full ms [200.00-500.00]

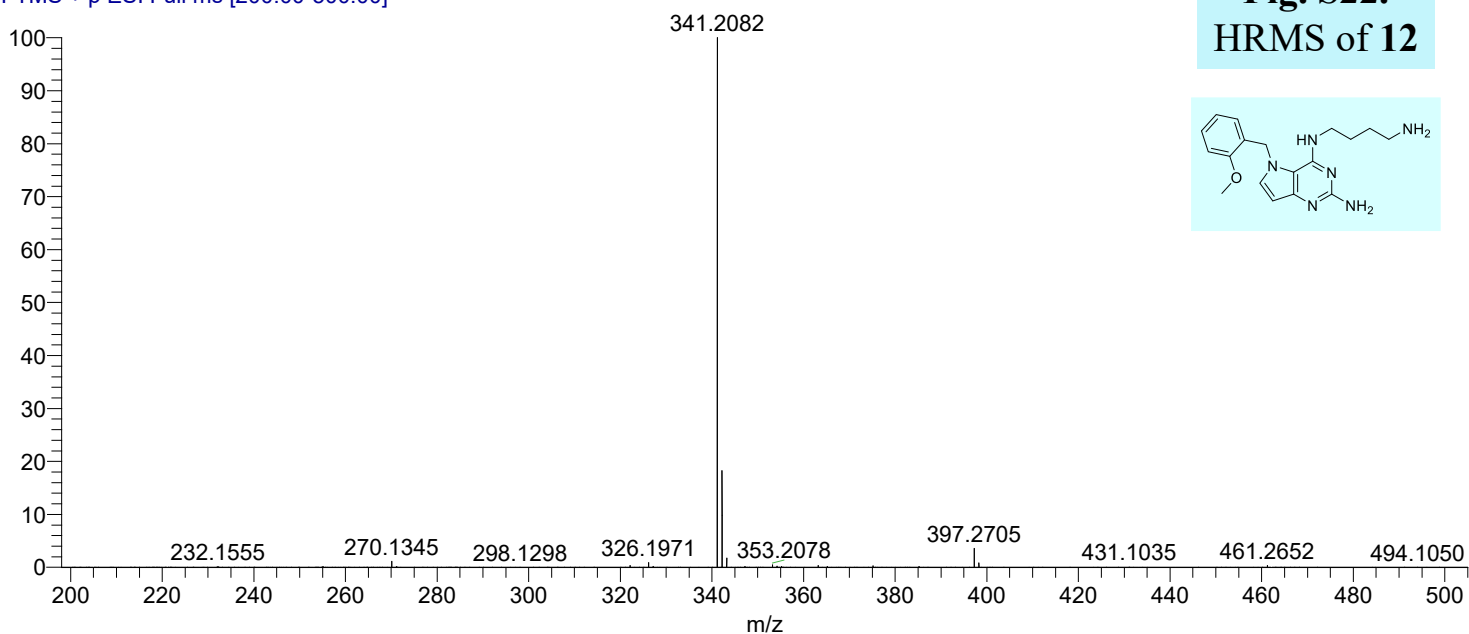

HRMS (ESI)  $m/z$   $[M+H]^+$  calculated for  
 $C_{18}H_{25}N_6O$ : 341.2090 found: 341.2082.

714 #10-70 RT: 0.10-0.65 AV: 30 NL: 2.82E9  
T: FTMS + p ESI Full ms [200.00-500.00]

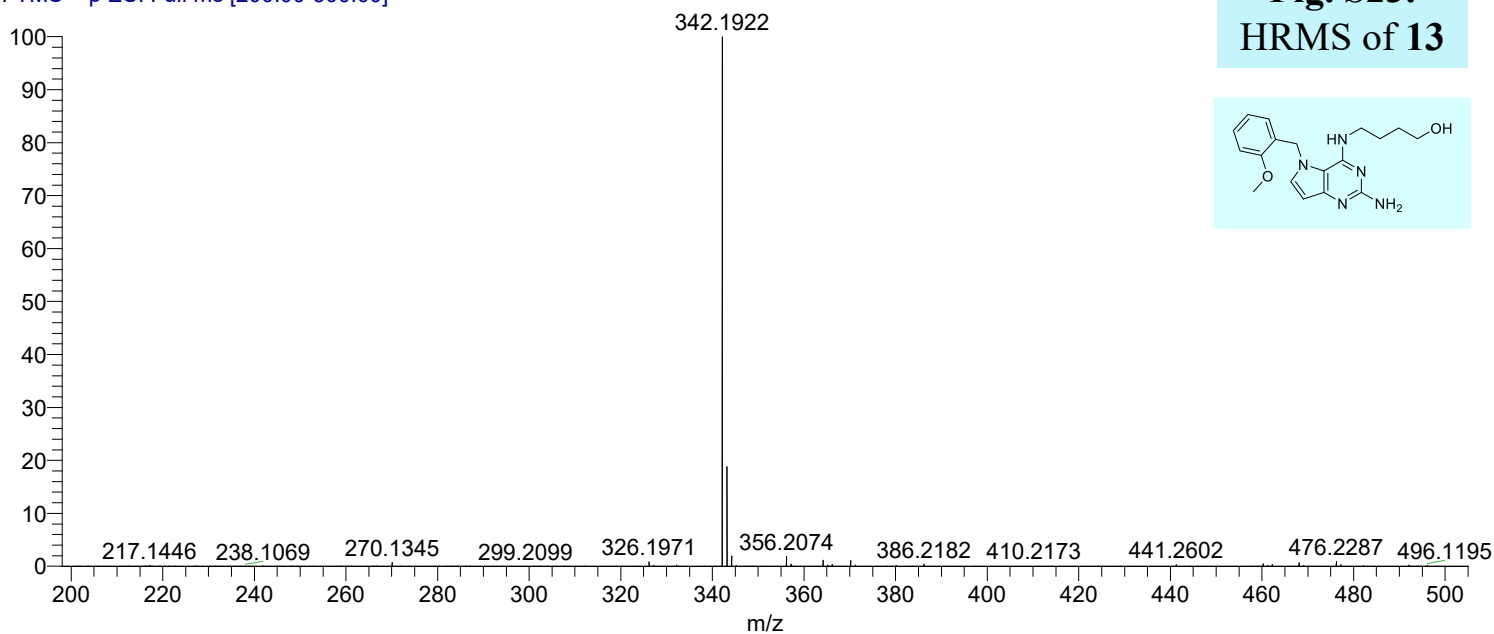

**Fig. S23.**  
HRMS of 13

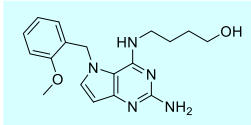

HRMS (ESI) m/z [M+H]<sup>+</sup> calculated for  
C<sub>18</sub>H<sub>24</sub>N<sub>5</sub>O<sub>2</sub>: 342.1930 found: 342.1922.

715 #11-66 RT: 0.10-0.61 AV: 28 NL: 2.48E9  
T: FTMS + p ESI Full ms [200.00-500.00]

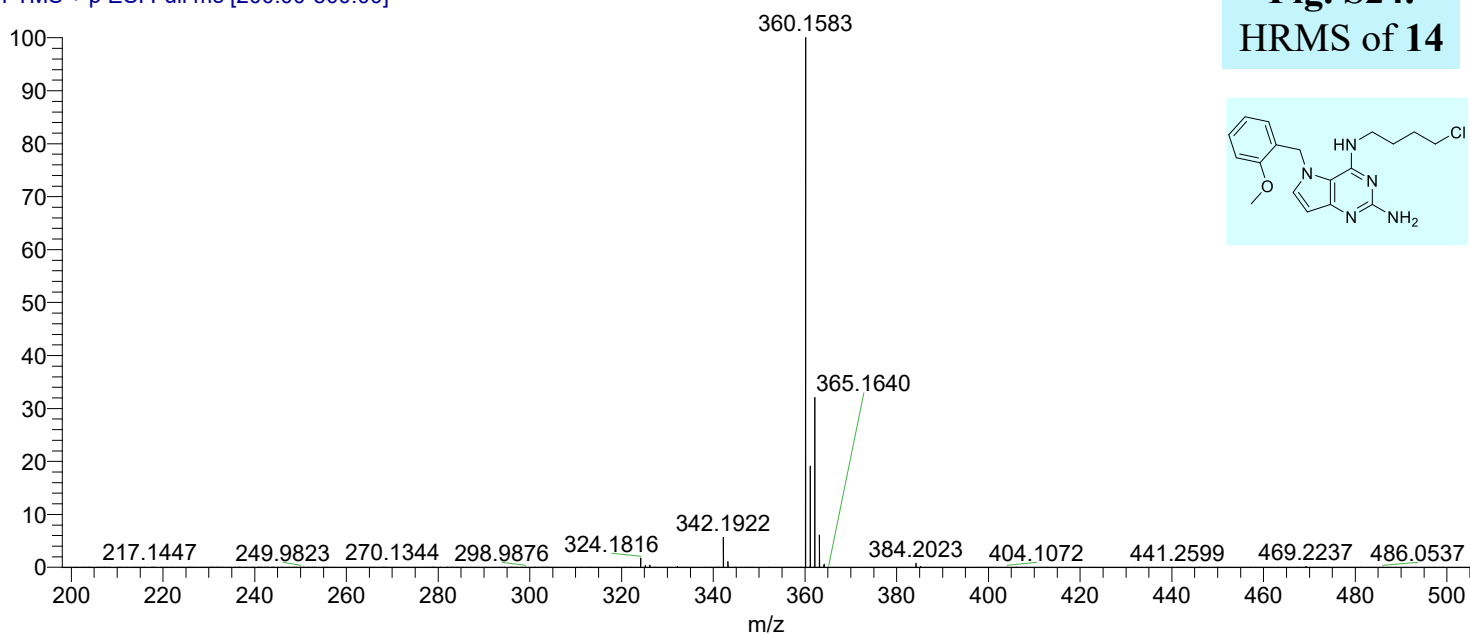

**Fig. S24.**  
HRMS of 14

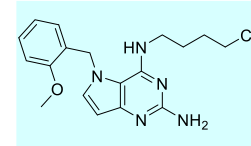

HRMS (ESI) m/z [M+H]<sup>+</sup> calculated for  
C<sub>18</sub>H<sub>23</sub>ClN<sub>5</sub>O: 360.1591 found: 360.1583.
